# Supplementary material for: New Phenolic Dimers from Plant Paeonia suffruticosa and Their Cytotoxicity and NO Production Inhibition
Source: Molecules. 2023 Jun 6;28(12):4590. doi: 10.3390/molecules28124590 (PMC10303828; doi:10.3390/molecules28124590)
Supplement: Supplementary file 1 [file molecules-28-04590-s001.zip › Supporting information.pdf]

*Supporting Information for*

## **New phenolic dimers from plant *Paeonia suffruticosa* and their cytotoxicity and NO production inhibition**

Qian-Qian Meng <sup>1,2</sup>, Shun-Yao Tong <sup>1</sup>, Yu-Qing Zhao <sup>1</sup>, Xing-Rong Peng <sup>3</sup>, Zheng-Hui Li <sup>1</sup>, Tao Feng<sup>1,\*</sup>, Ji-Kai Liu<sup>1,\*</sup>

<sup>1</sup> School of Pharmaceutical Sciences, South-Central Minzu University, Wuhan, Hubei 430074, People's Republic of China

<sup>2</sup> Medical school, Fuyang Normal University, Fuyang, 236037, People's Republic of China

<sup>3</sup> State Key Laboratory of Phytochemistry and Plant Resources in West China, Kunming Institute of Botany, Chinese Academy of Sciences, Kunming, 650201, People's Republic of China

\* Correspondence: E-mails: tfeng@mail.scuec.edu.cn (T. Feng); liujikai@mail.scuec.edu.cn (J.K. Liu).

Corresponding author: tfeng@mail.scuec.edu.cn (T. Feng); liujikai@mail.scuec.edu.cn (J.K. Liu).

## Contents of Supporting Information

- Section S1. NMR and MS for compounds 1–5.
  - Figure S1-S4 NMR spectra of paeobenzofuranone A (1)
  - Figure S5 HRESIMS spectrum of paeobenzofuranone A (1)
  - Figure S6-S11 NMR spectra of paeobenzofuranone B (2)
  - Figure S12 HRESIMS spectrum of paeobenzofuranone B (2)
  - Figure S13-S17 NMR spectra of paeobenzofuranone C (3)
  - Figure S18 HRESIMS spectra of paeobenzofuranone C (3)
  - Figure S16-S23 NMR spectra of paeobenzofuranone D (4)
  - Figure S24 HRESIMS spectra of paeobenzofuranone D (4)
  - Figure S25-S29 NMR spectra of paeobenzofuranone E (5)
  - Figure S30 HRESIMS spectra of paeobenzofuranone E (5)
- Section S2. Computational details for compounds 1–5.
  - Section S2-1. Computational details for paeobenzofuranone A (1) (ECD)
  - Section S2-2. Computational details for paeobenzofuranone B (2) (ECD)
  - Section S2-3. Computational details for paeobenzofuranone C (3) (ECD)
  - Section S2-4. Computational details for paeobenzofuranone D (4) (ECD)
  - Section S2-5. Computational details for paeobenzofuranone E (5) (ECD)

**Section S1. NMR and MS for compounds 1–5.**

**Figure S1.  $^1\text{H}$  NMR (600 MHz, Methanol- $d_4$ ) spectrum of paeobenzofuranone A (1).**

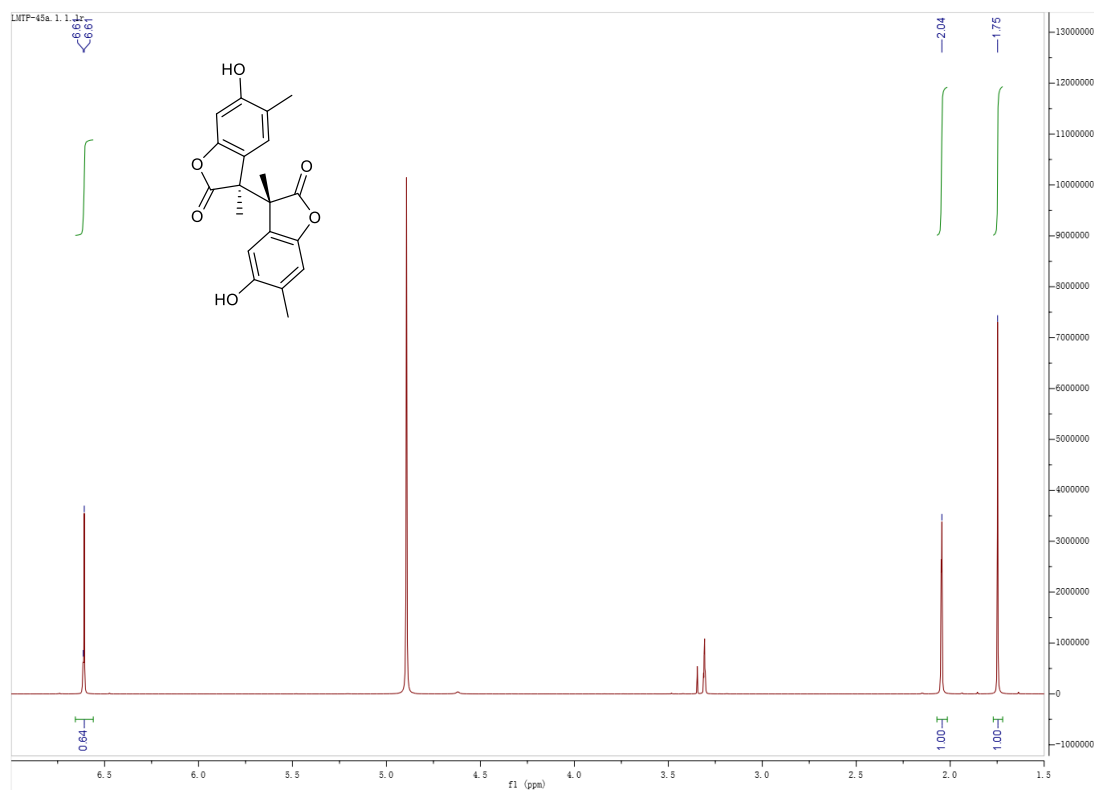

**Figure S2.  $^{13}\text{C}$  NMR (150 MHz, Methanol- $d_4$ ) spectrum of paeobenzofuranone A (1).**

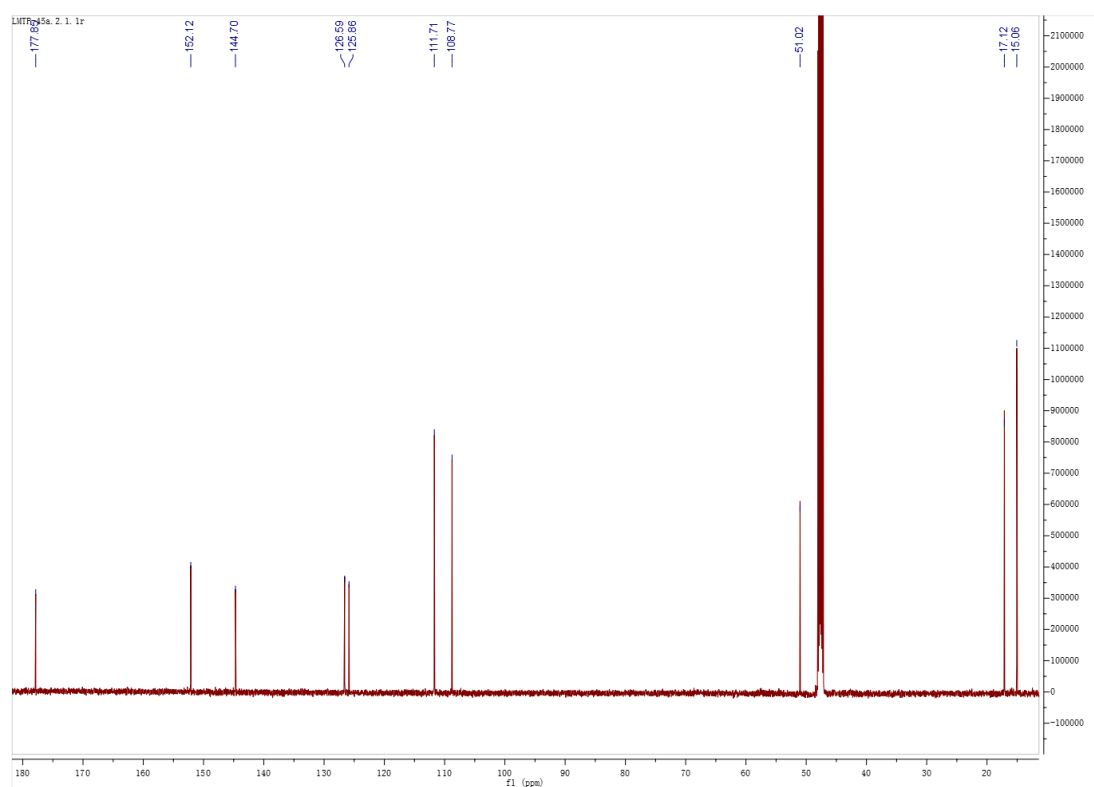

**Figure S3. HSQC (600/150 MHz, Methanol- $d_4$ ) spectrum of paeobenzofuranone A (1).**

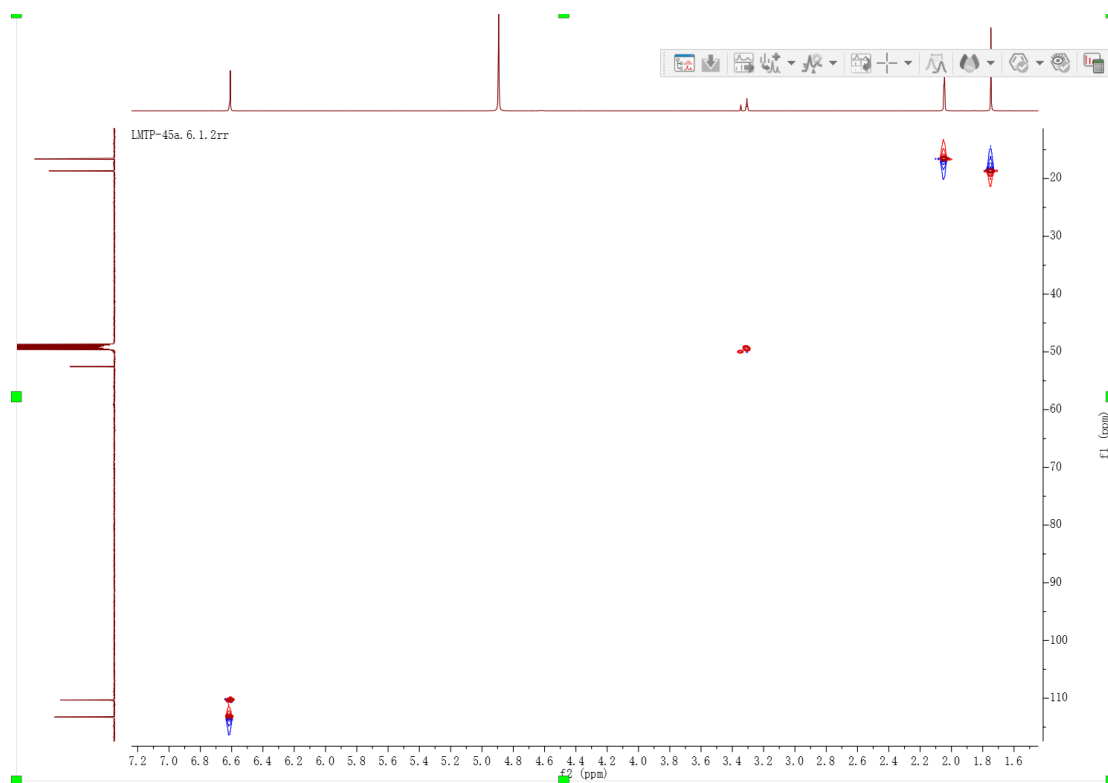

**Figure S4. HMBC (600/150 MHz, Methanol- $d_4$ ) spectrum of paeobenzofuranone A (1).**

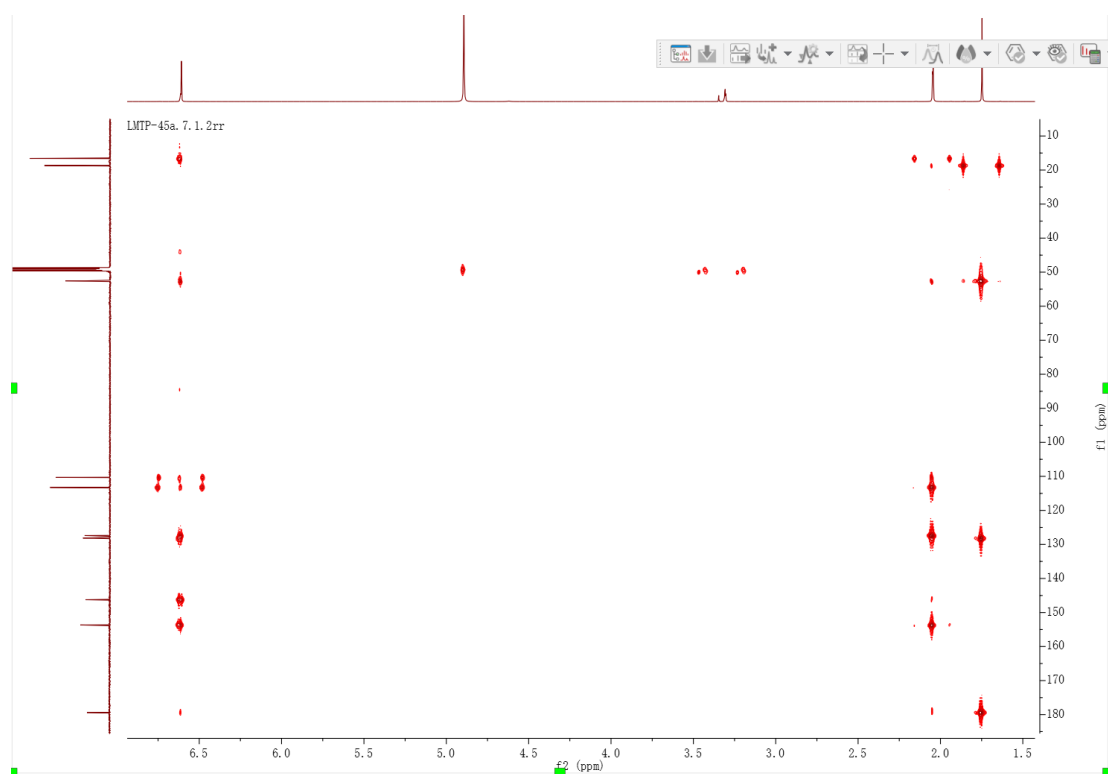

**Figure S5. HRESIMS spectrum of paeobenzofuranone A (1)**

D:\1-Liu-jikai\...2022\20220415\lmp45a

04/15/22 14:29:07

lmp45a #13 RT: 0.17 AV: 1 SB: 17 1.47-1.93 NL: 1.02E7

T: FTMS + p ESI Full lock ms [100.0000-850.0000]

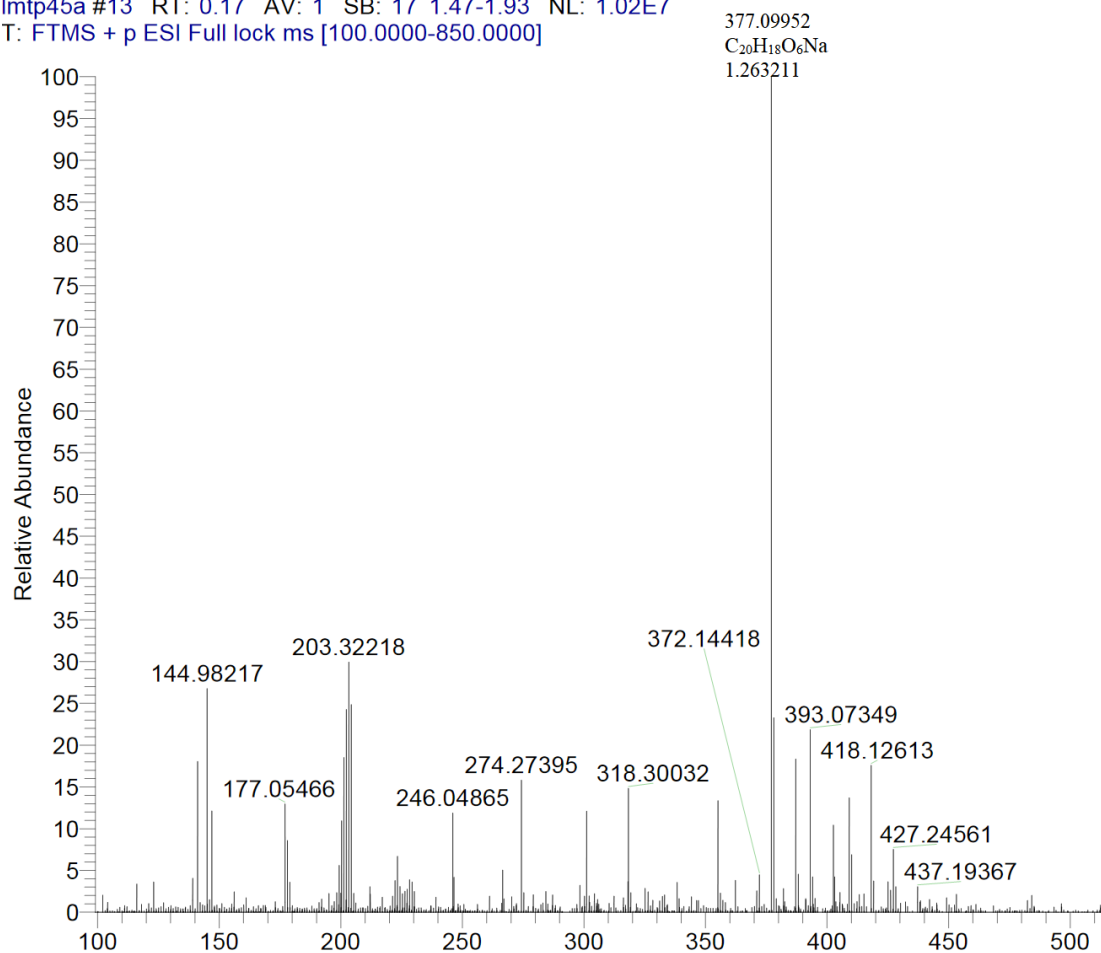

**Figure S6. <sup>1</sup>H NMR (600 MHz, Methanol-*d*<sub>4</sub>) spectrum of paeobenzofuranone B (2).**

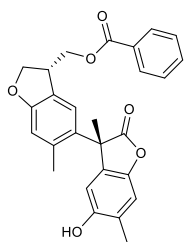

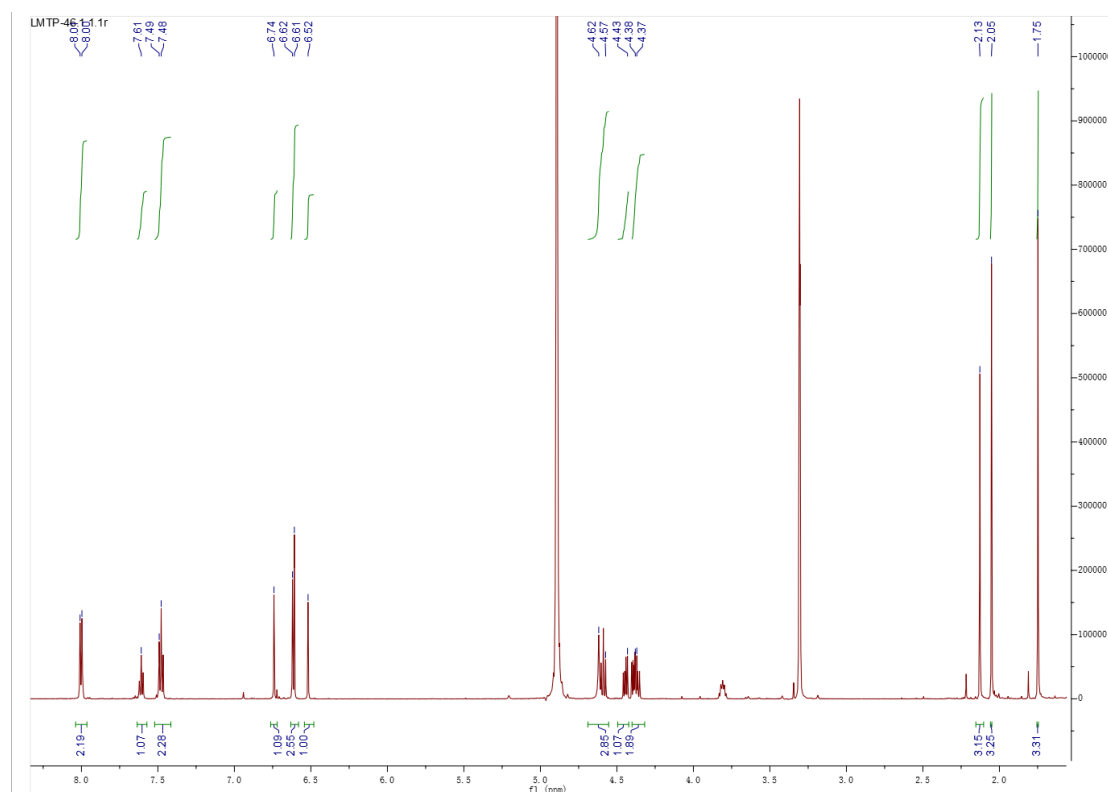

Figure S7.  $^{13}\text{C}$  NMR (150 MHz, Methanol- $d_4$ ) spectrum of paeobenzofuranone B (2).

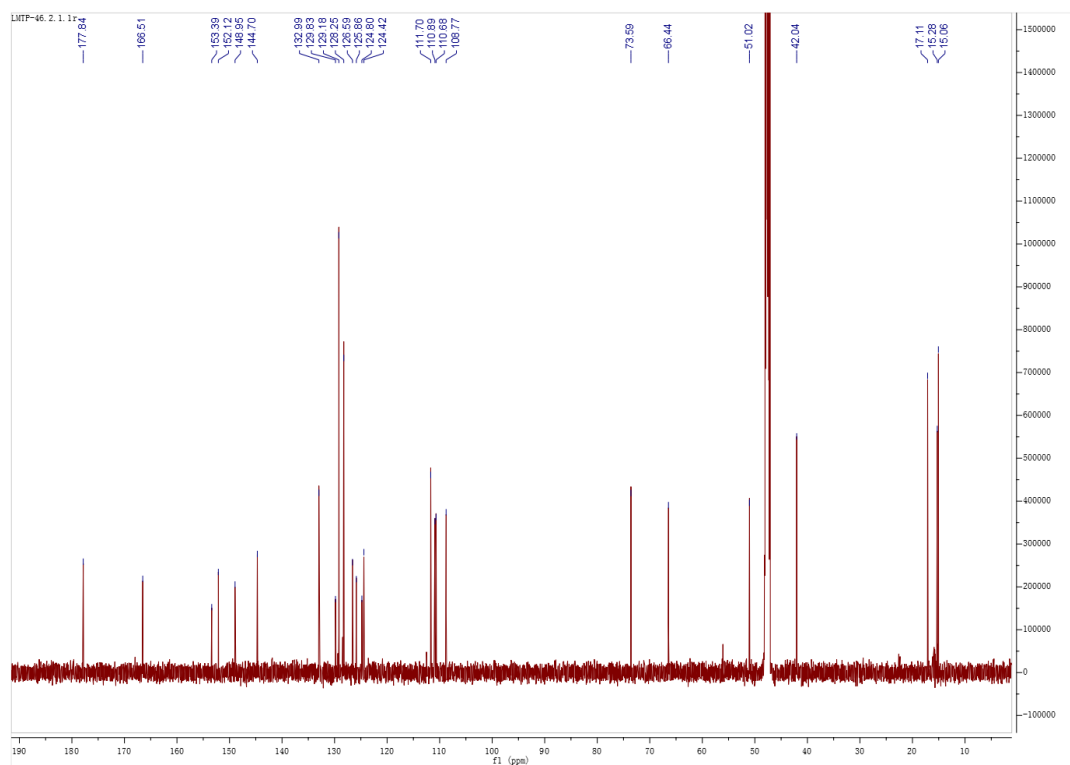

**Figure S8. HSQC (600/150 MHz, Methanol-*d*<sub>4</sub>) spectrum of paeobenzofuranone B (2).**

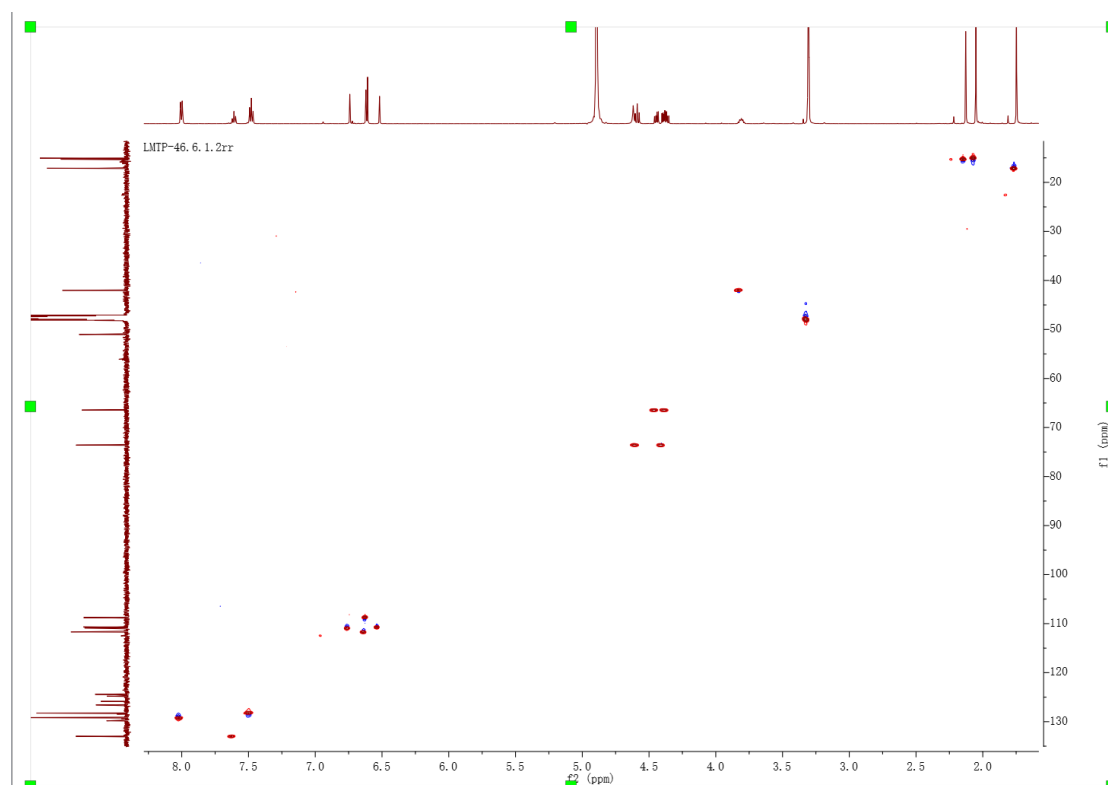

**Figure S9. HMBC (600/150 MHz, Methanol-*d*<sub>4</sub>) spectrum of paeobenzofuranone B (2).**

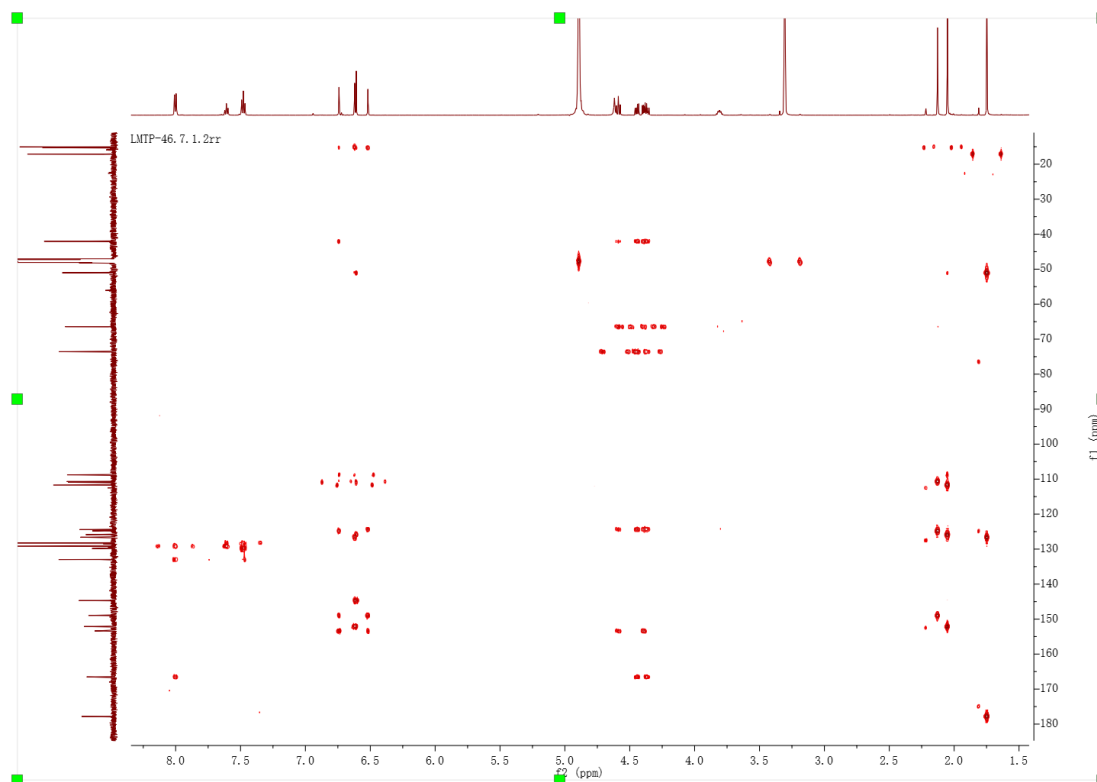

**Figure S10.  $^1\text{H}$ - $^1\text{H}$  COSY (600/150 MHz, methanol- $d_4$ ) spectrum of paeobenzofuranone B (2).**

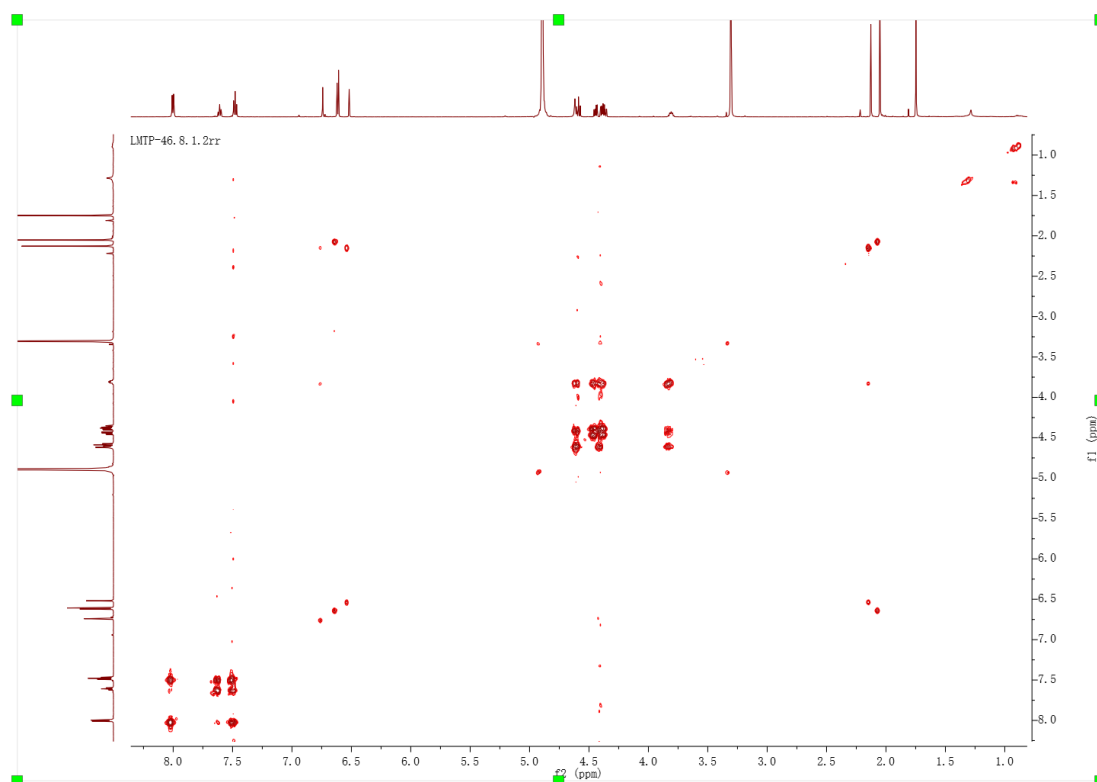

**Figure S11. ROESY (600/150 MHz, methanol- $d_4$ ) spectrum of paeobenzofuranone B (2).**

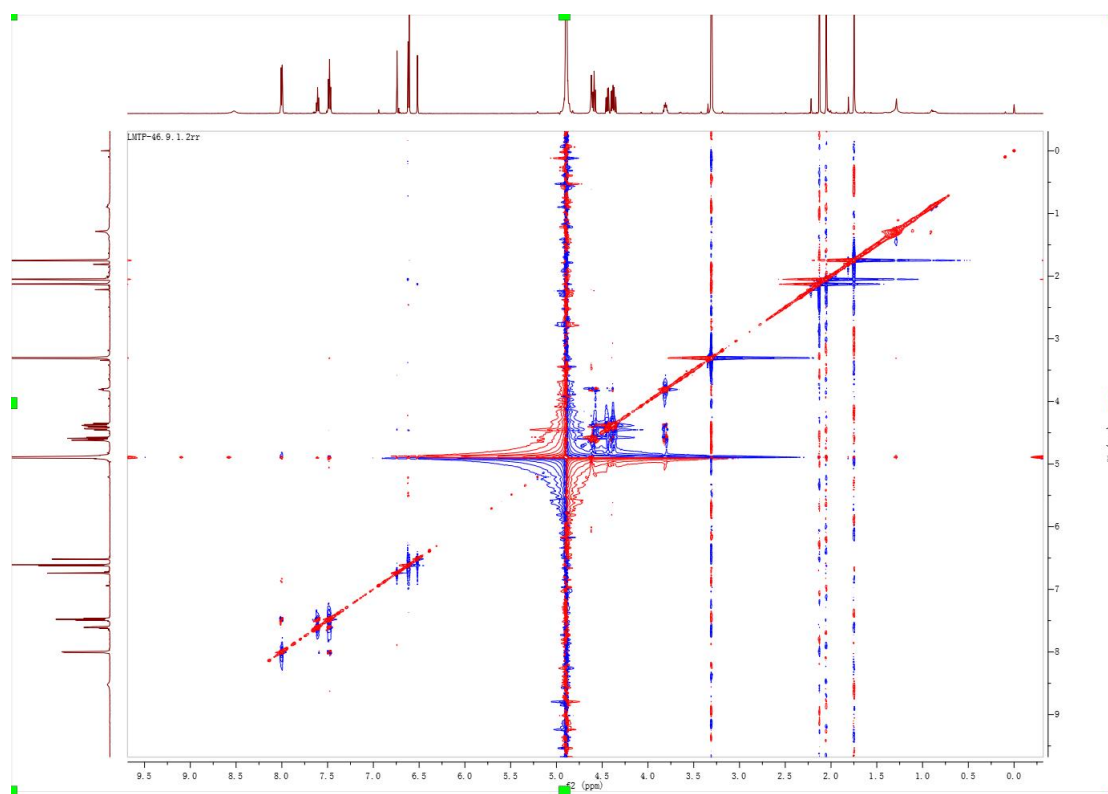

Figure S12. HRESIMS spectrum of paeobenzofuranone B (2)

TP46 #13 RT: 0.17 AV: 1 NL: 2.45E7

T: FTMS + p ESI Full lock ms [150.0000-1100.0000]

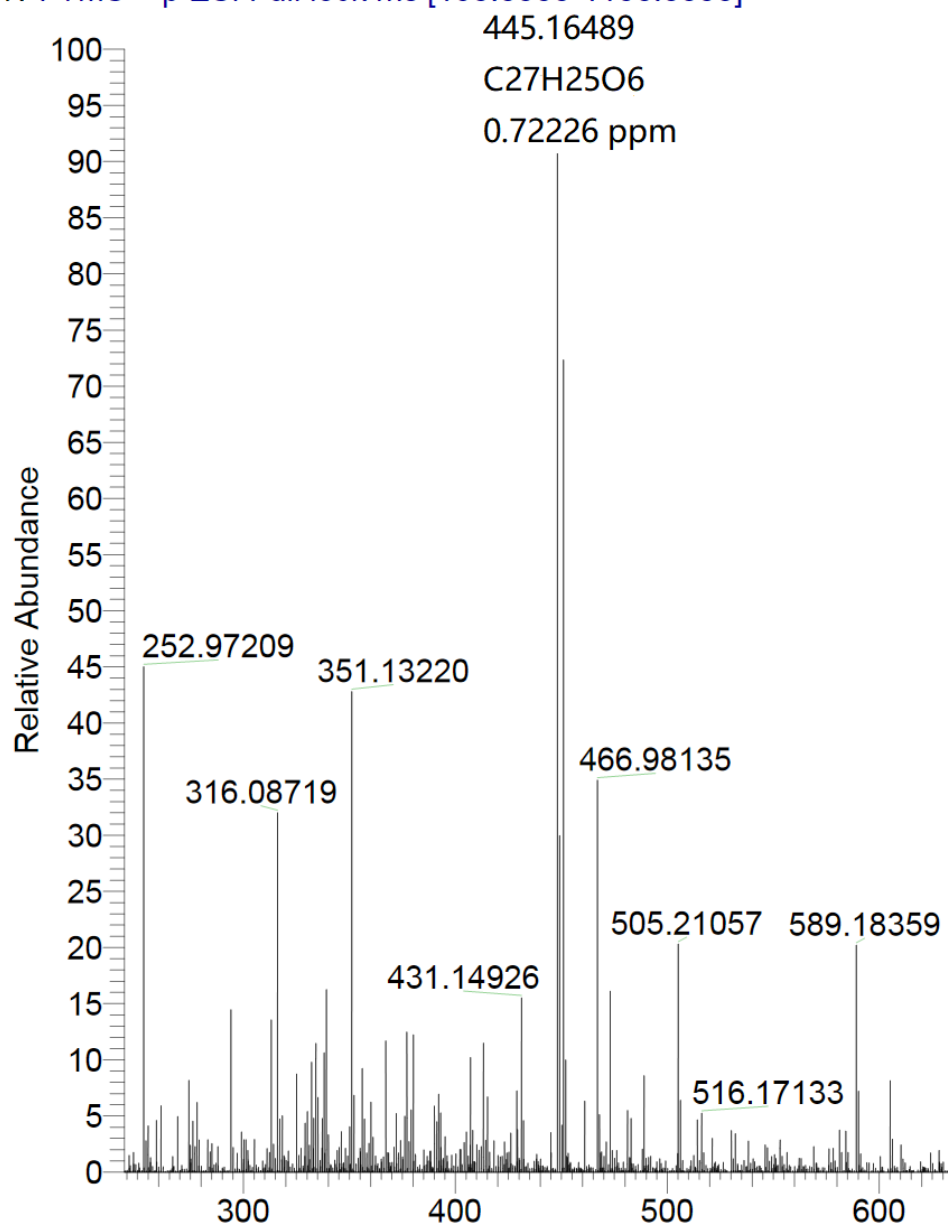

**Figure S13.  $^1\text{H}$  NMR (600 MHz, Methanol- $d_4$ ) spectrum of paeobenzofuranone C (3).**

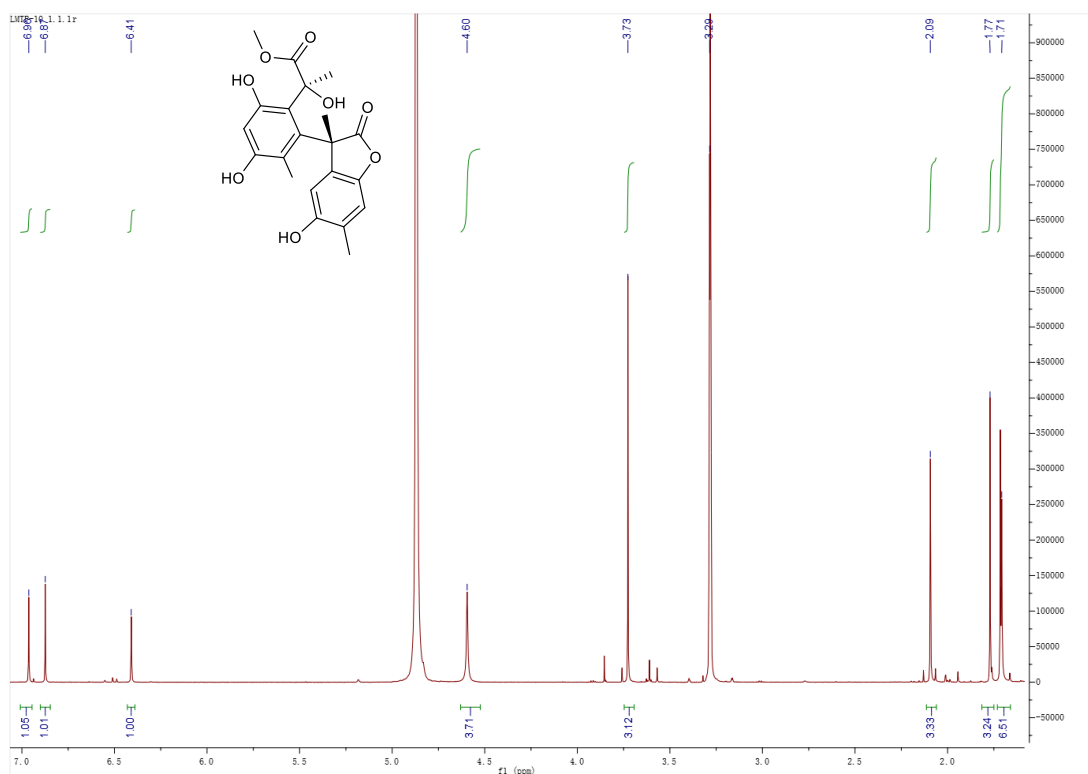

**Figure S14.  $^{13}\text{C}$  NMR (150 MHz, Methanol- $d_4$ ) spectrum of paeobenzofuranone C (3).**

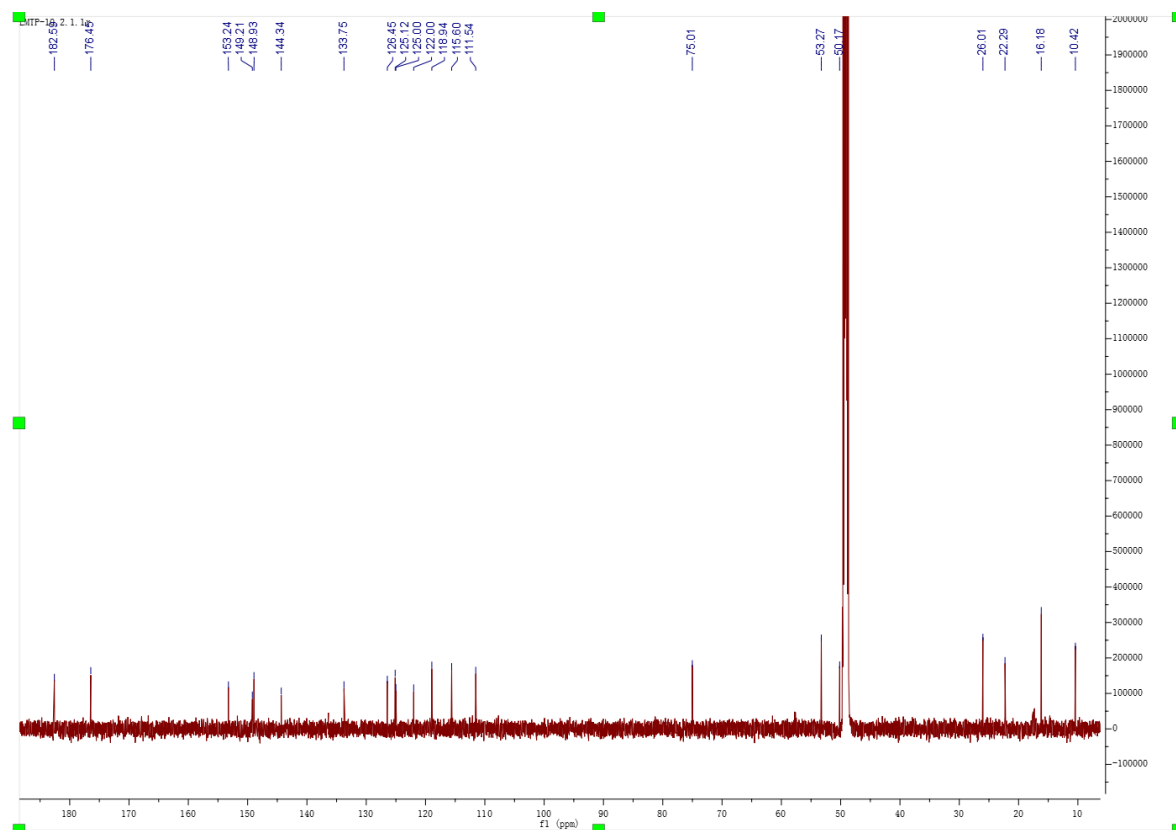

**Figure S15. HSQC (600/150 MHz, Methanol- $d_4$ ) spectrum of paeobenzofuranone C (3).**

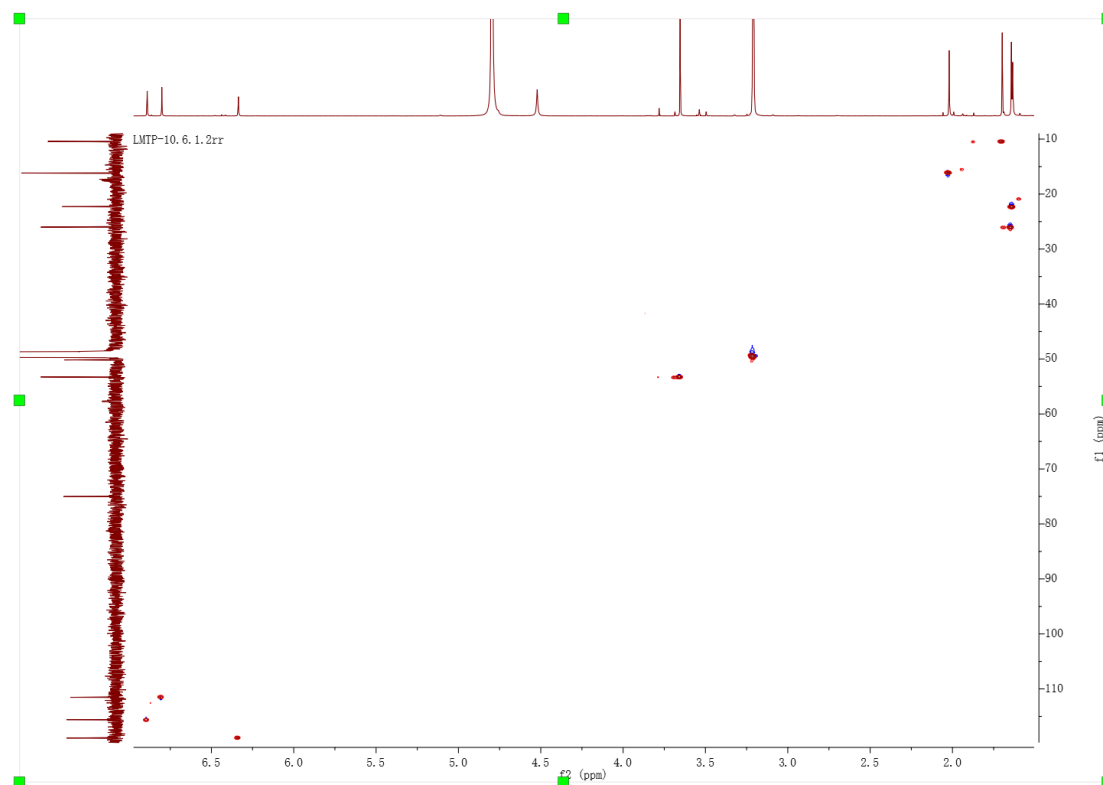

**Figure S16. HMBC (600/150 MHz, Methanol- $d_4$ ) spectrum of paeobenzofuranone C (3).**

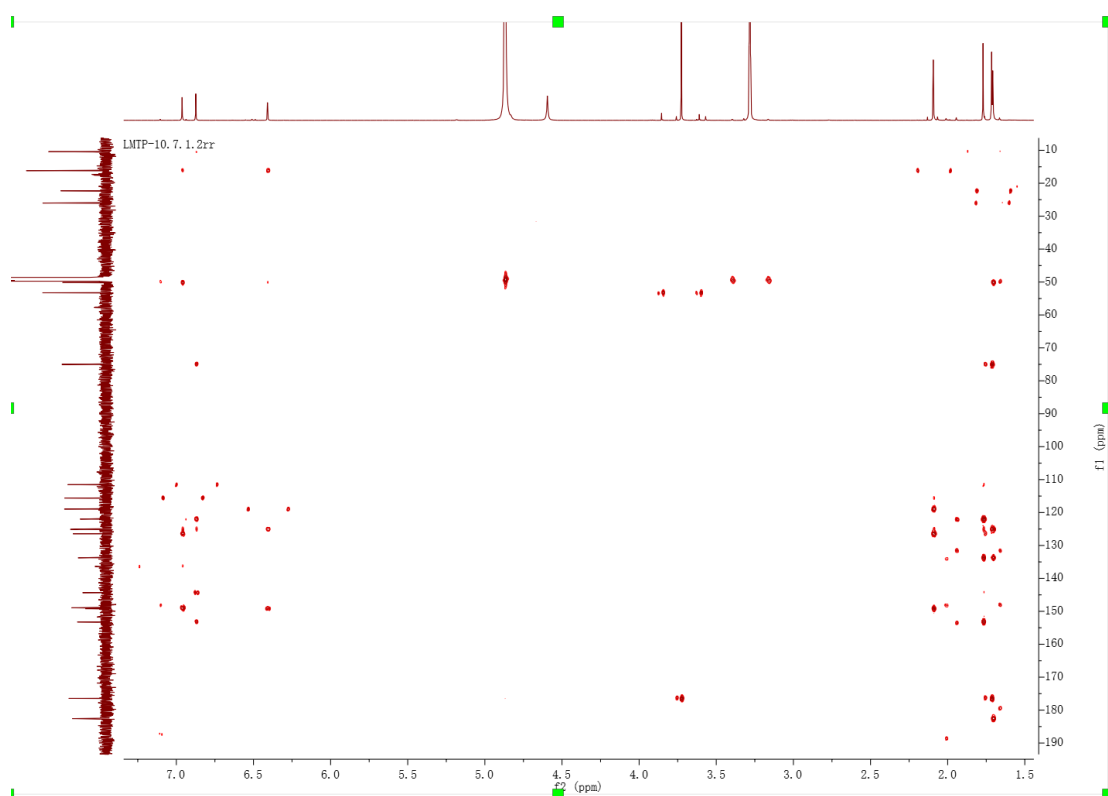

**Figure S17.  $^1\text{H}$ - $^1\text{H}$  COSY (600 MHz, methanol- $d_4$ ) spectrum of paeobenzofuranone C (3).**

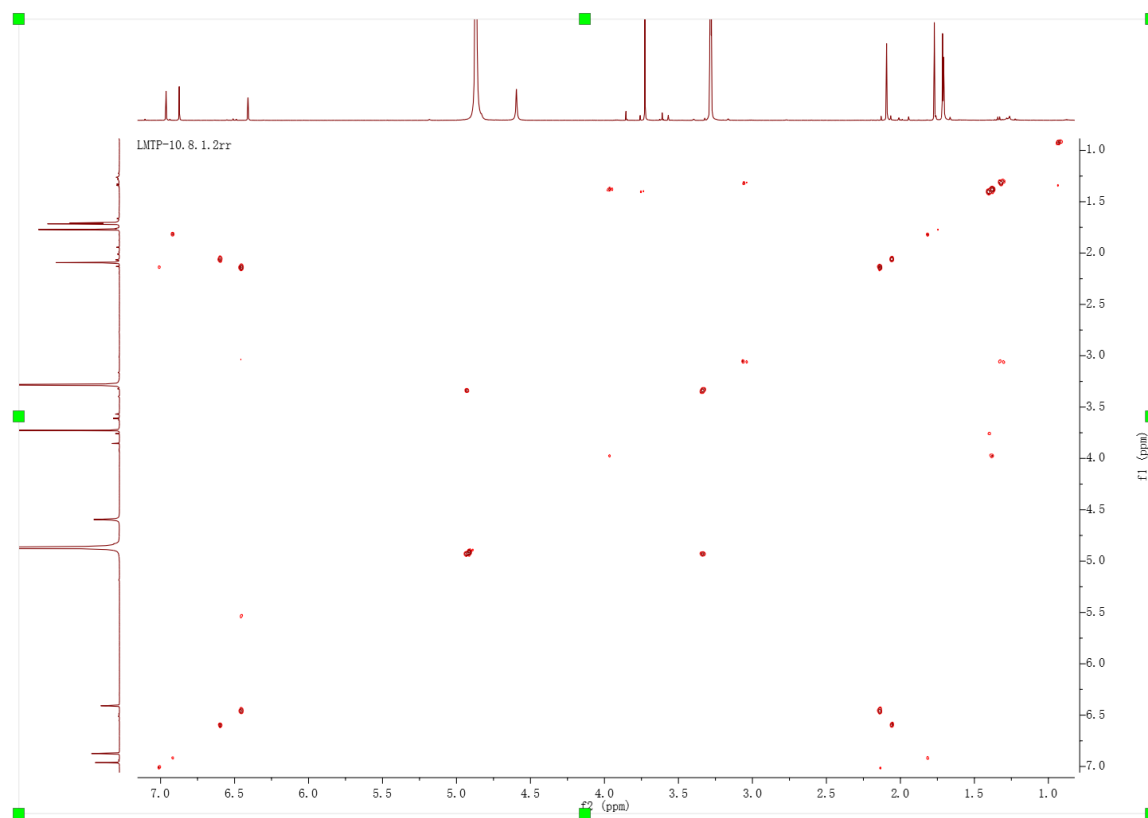

**Figure S18. HRESIMS spectrum of paeobenzofuranone C (3)**

D:\1-Liu-jikai\...2021\20211201\LMTP10

12/01/21 09:23:28

LMTP10 #13 RT: 0.17 AV: 1 NL: 1.53E8

T: FTMS + p ESI Full lock ms [150.0000-1100.0000]

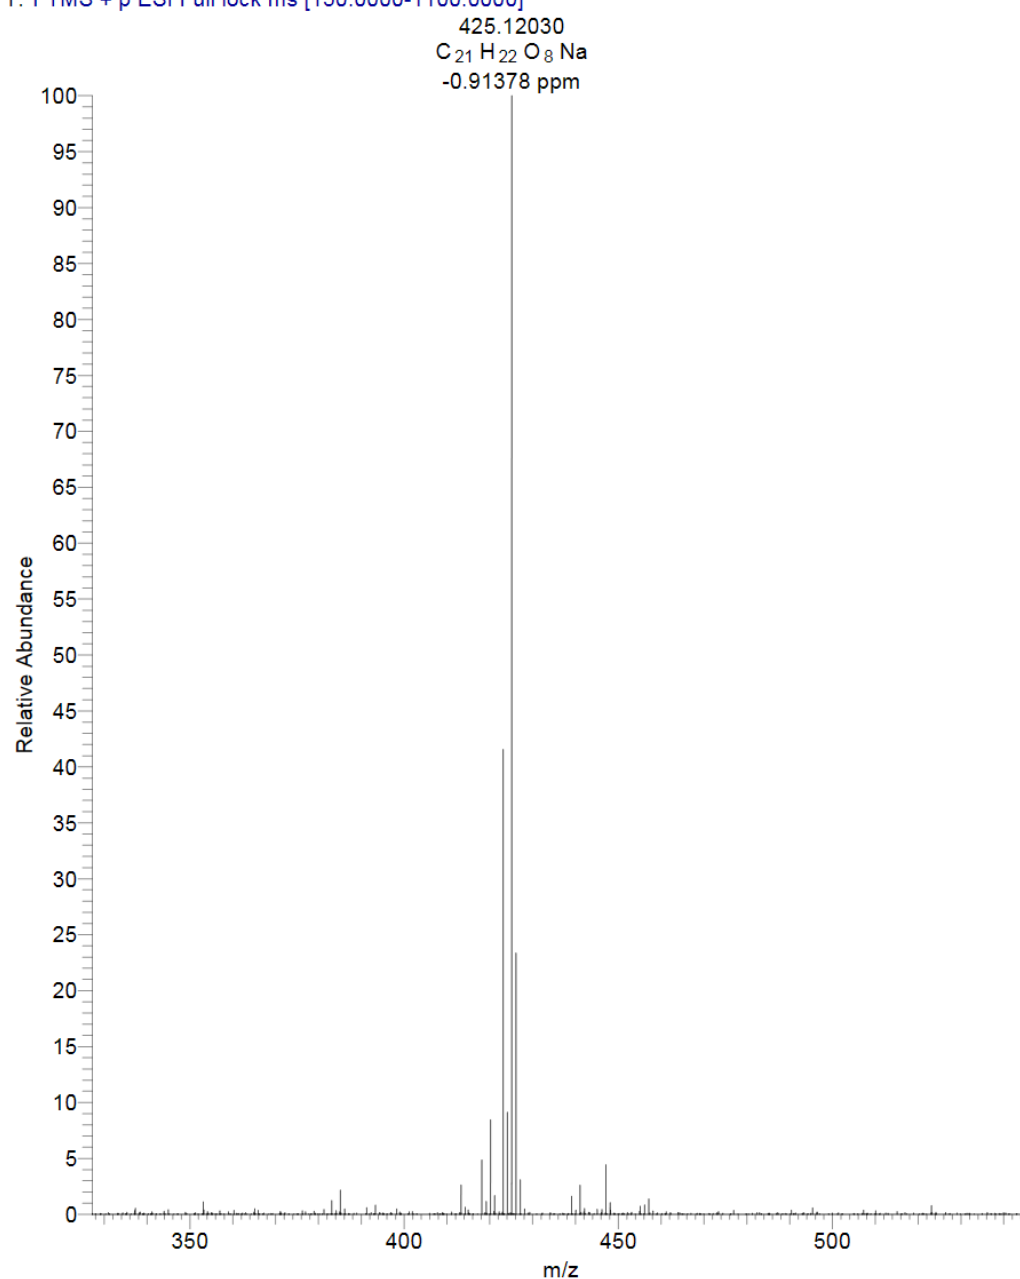

**Figure S19.  $^1\text{H}$  NMR (600 MHz, Methanol- $d_4$ ) spectrum of paeobenzofuranone D (4).**

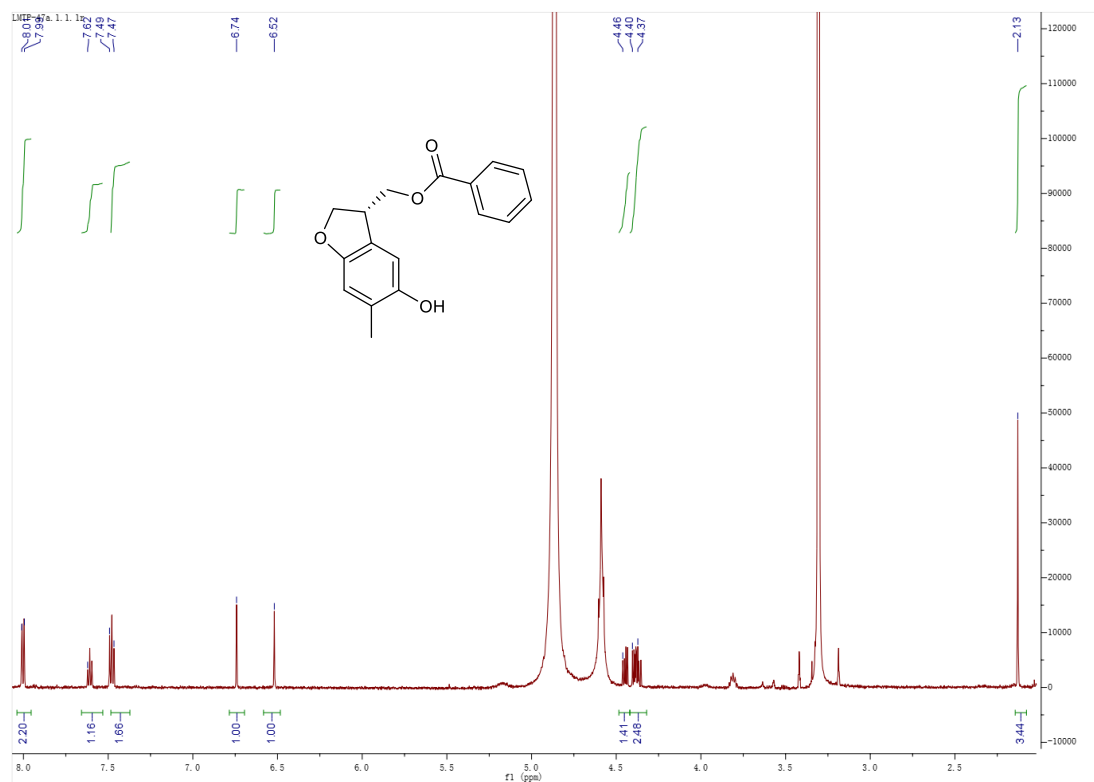

**Figure S20.  $^{13}\text{C}$  NMR (150 MHz, Methanol- $d_4$ ) spectrum of paeobenzofuranone D (4).**

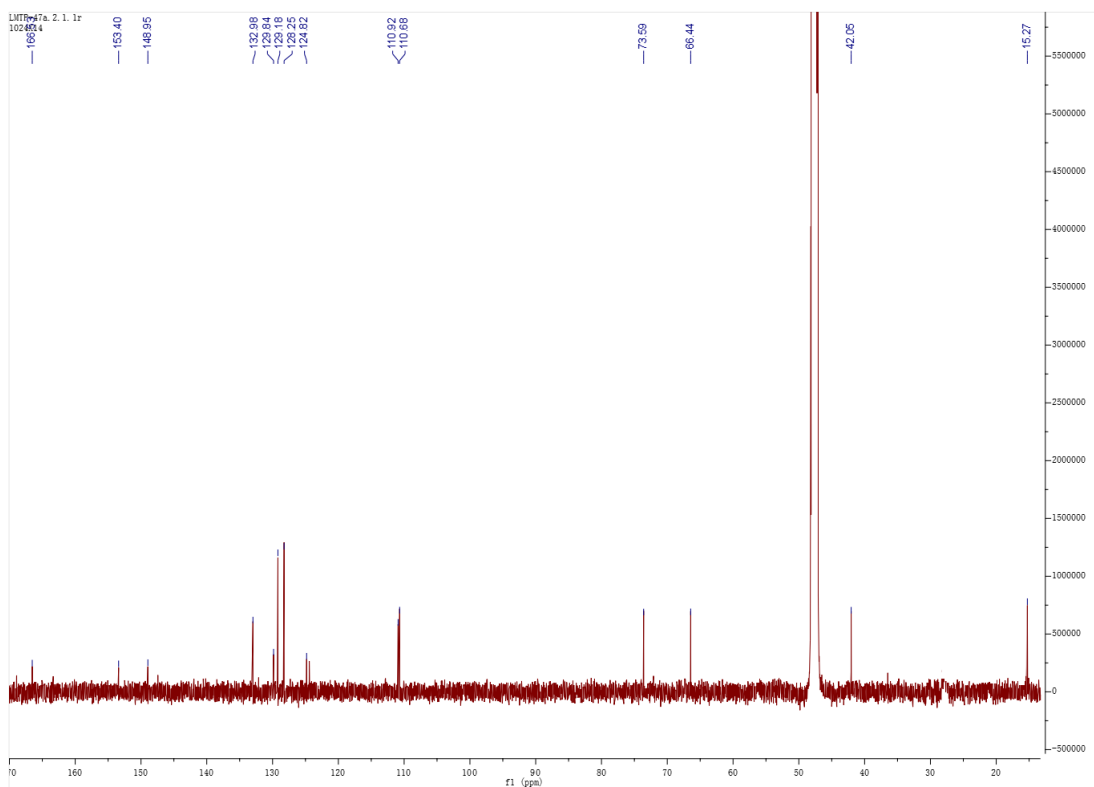

**Figure S21. HSQC (600/150 MHz, Methanol-*d*<sub>4</sub>) spectrum of paeobenzofuranone D (4).**

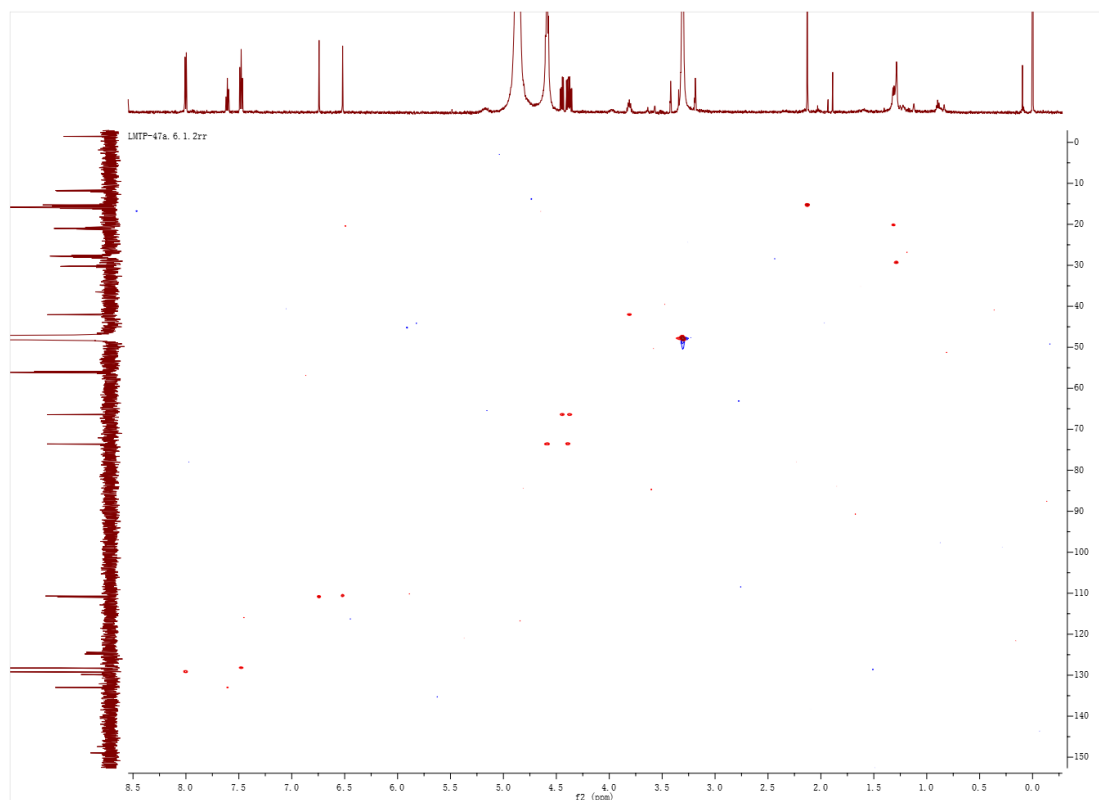

**Figure S22. HMBC (600/150 MHz, Methanol-*d*<sub>4</sub>) spectrum of paeobenzofuranone D (4).**

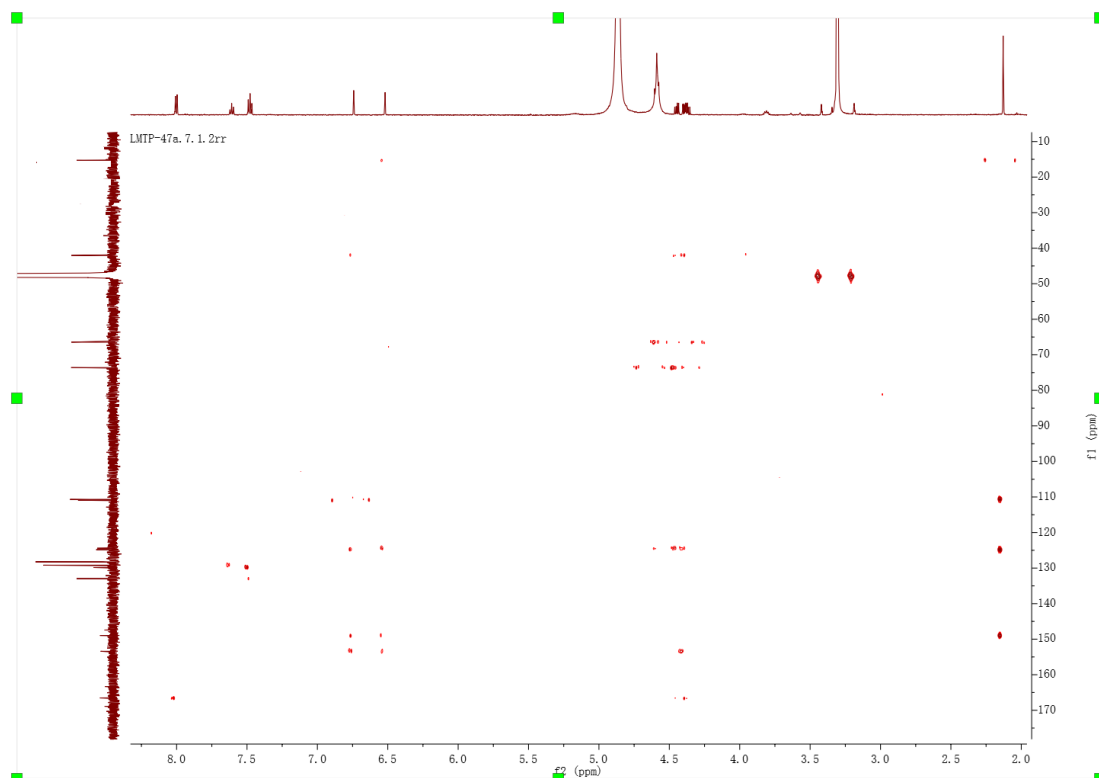

**Figure S23.  $^1\text{H}$ - $^1\text{H}$  COSY (600, Methanol- $d_4$ ) spectrum of paeobenzofuranone D (4).**

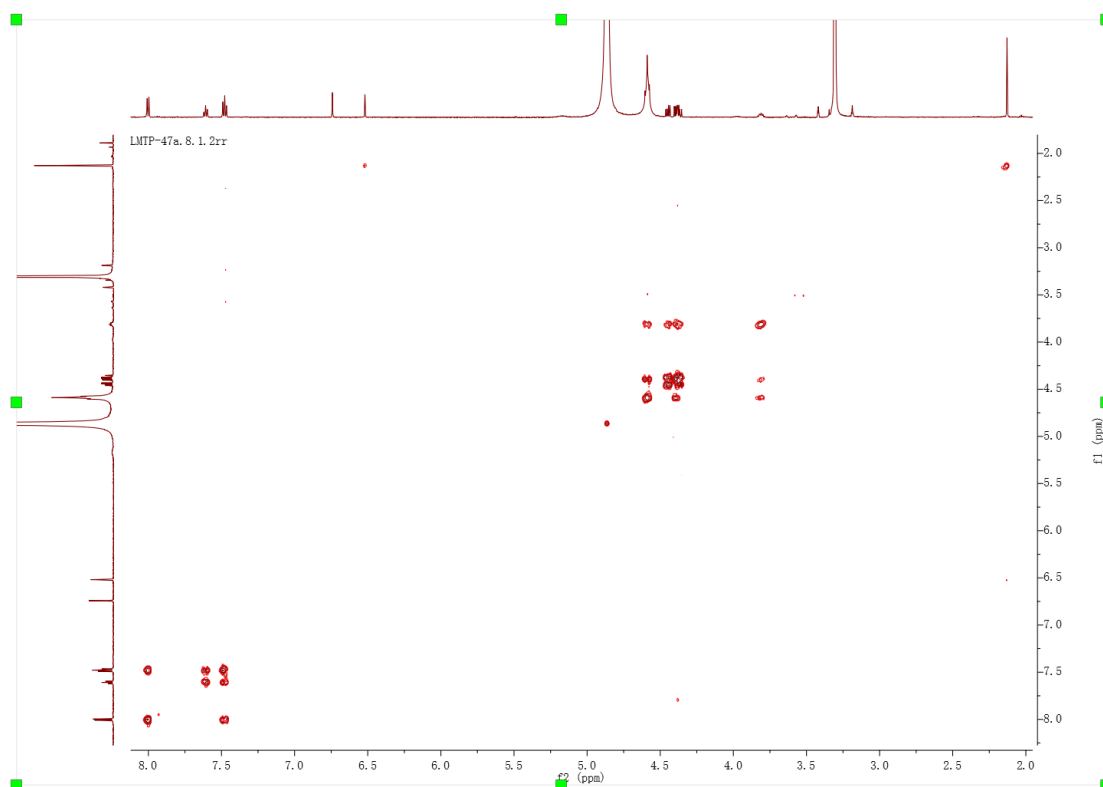

**Figure S24. HRESIMS spectrum of paeobenzofuranone D (4)**

D:\1-Liu-jikai\...\2022\20220329\TP47

03/28/22 16:32:11

TP47 #13 RT: 0.17 AV: 1 NL: 8.58E5

T: FTMS + p ESI Full lock ms [150.0000-1100.0000]

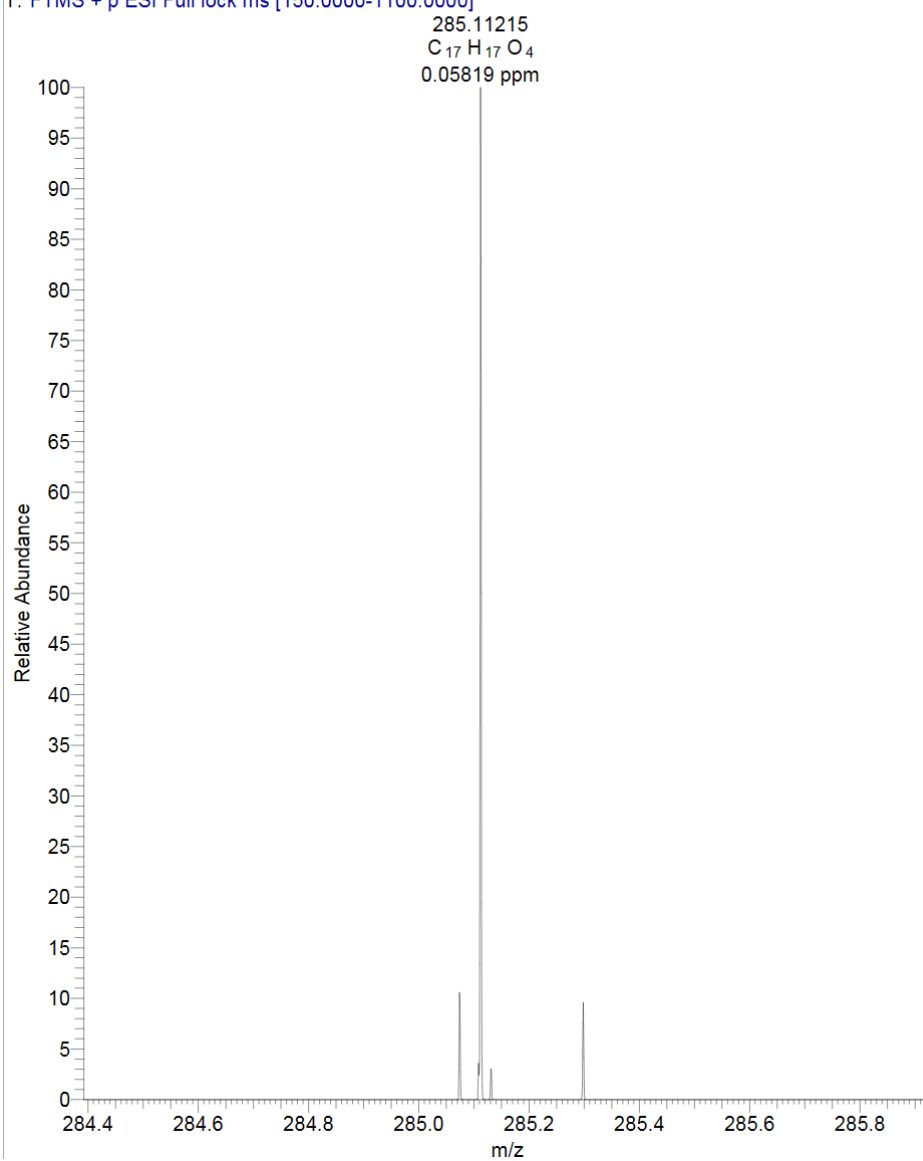

Figure S25.  $^1\text{H}$  NMR (600 MHz, Methanol- $d_4$ ) spectrum of paeobenzofuranone E (5).

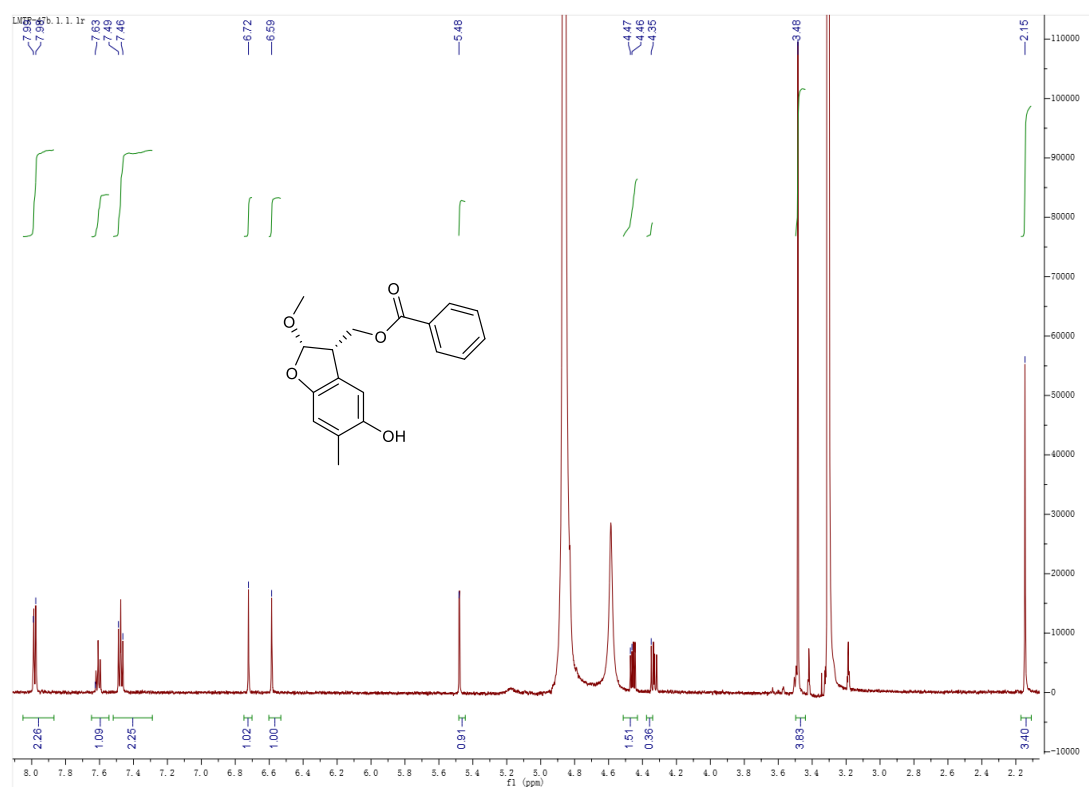

Figure S26.  $^{13}\text{C}$  NMR (150 MHz, Methanol- $d_4$ ) spectrum of paeobenzofuranone E (5).

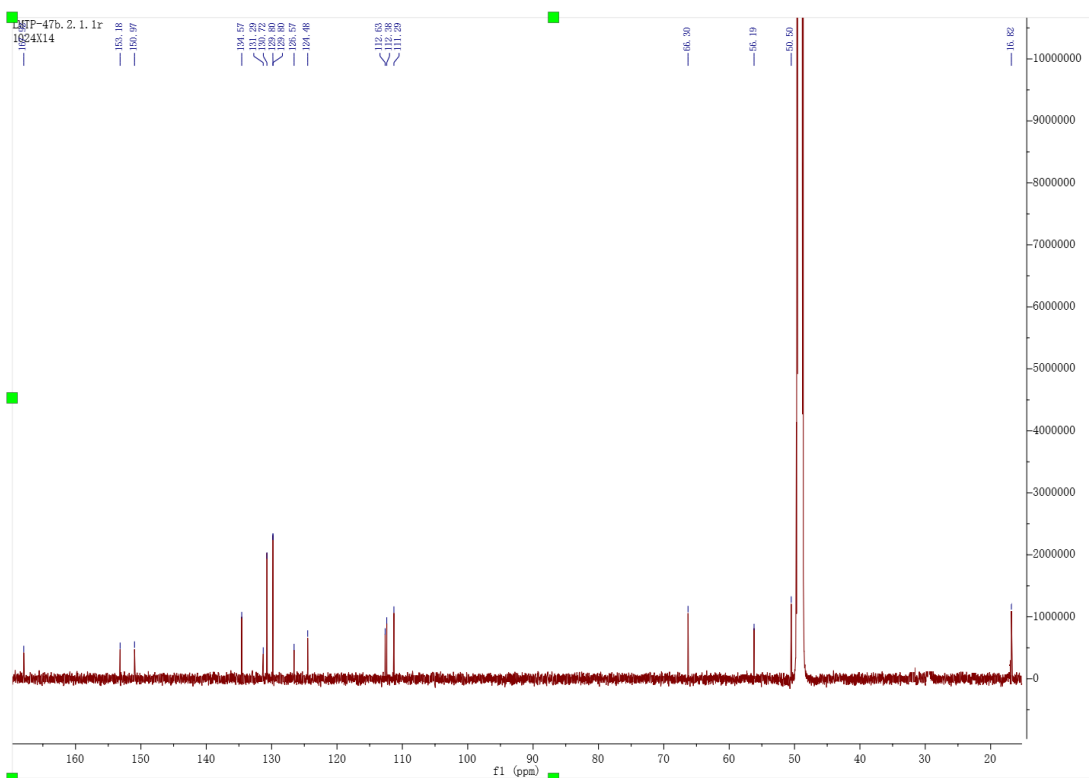

**Figure S27. HSQC (600/150 MHz, Methanol-*d*<sub>4</sub>) spectrum of paeobenzofuranone E (5).**

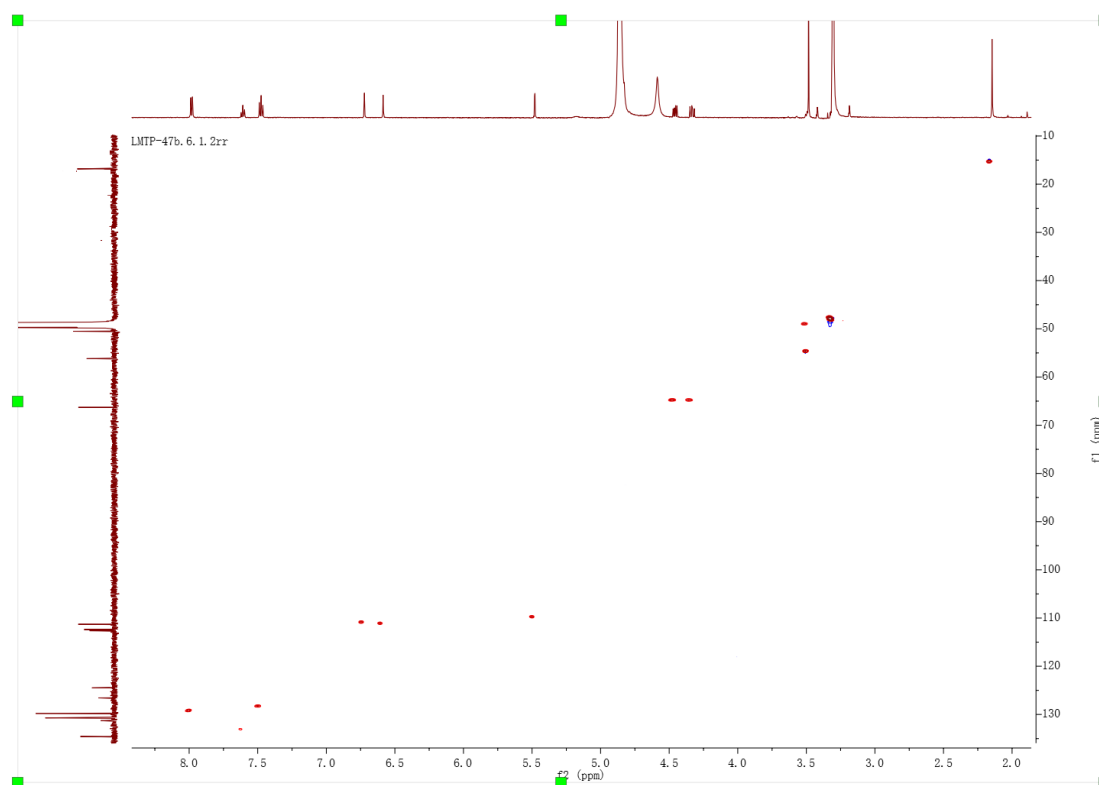

**Figure S28. HMBC (600/150 MHz, Methanol-*d*<sub>4</sub>) spectrum of paeobenzofuranone E (5).**

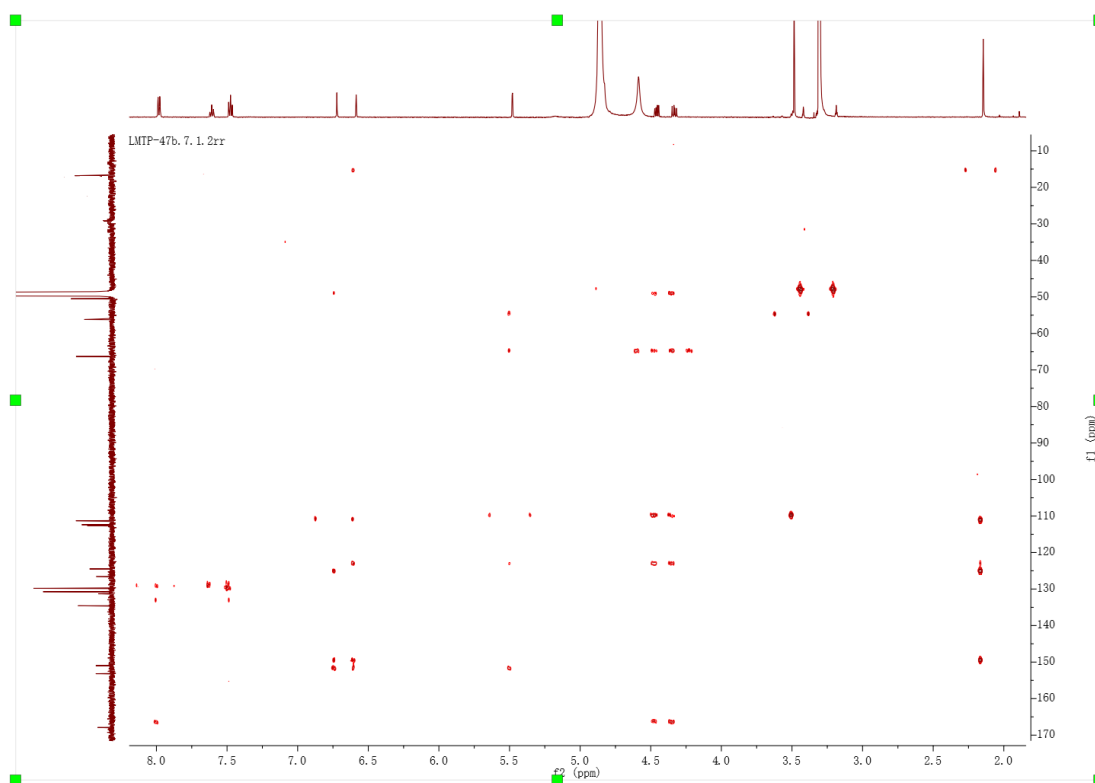

**Figure S29.  $^1\text{H}$ - $^1\text{H}$  COSY (600, Methanol- $d_4$ ) spectrum of pacobenzofuranone E (5).**

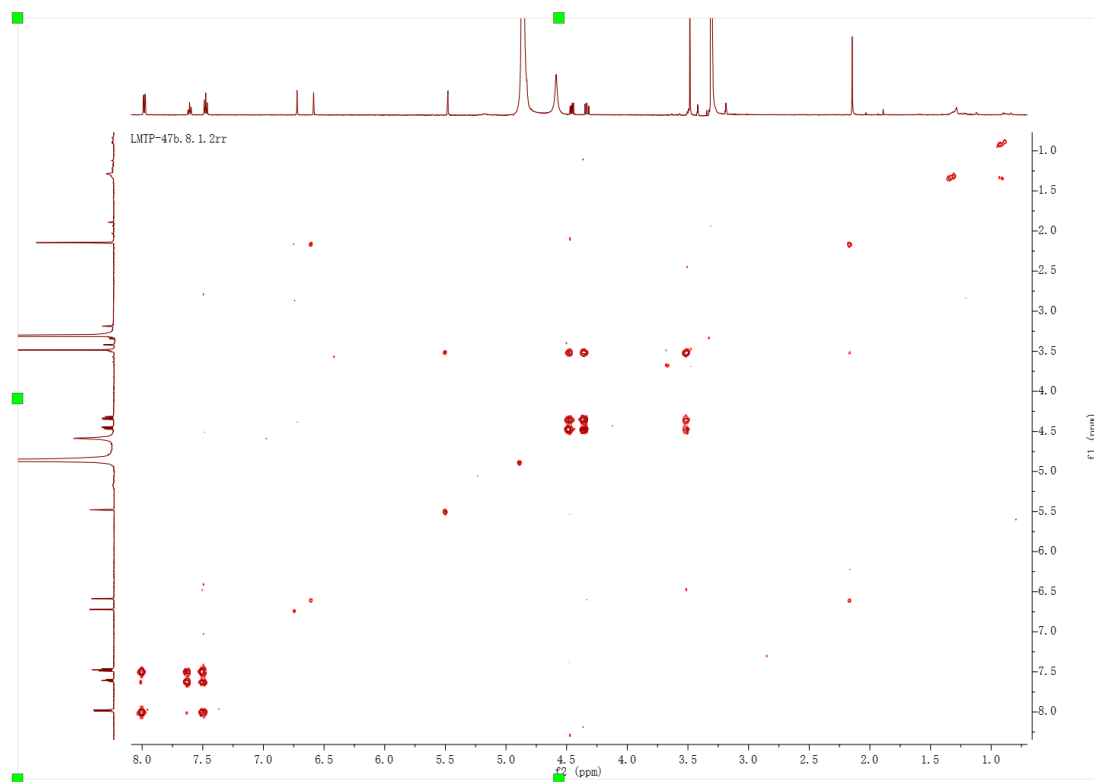

**Figure S30. HRESIMS spectrum of paeobenzofuranone E (5)**

D:\1-Liu-jikai\2022\20220329\TP47

03/28/22 16:32:11

TP47 #14 RT: 0.18 AV: 1 NL: 1.20E7

T: FTMS - p ESI Full lock ms [150.0000-1100.0000]

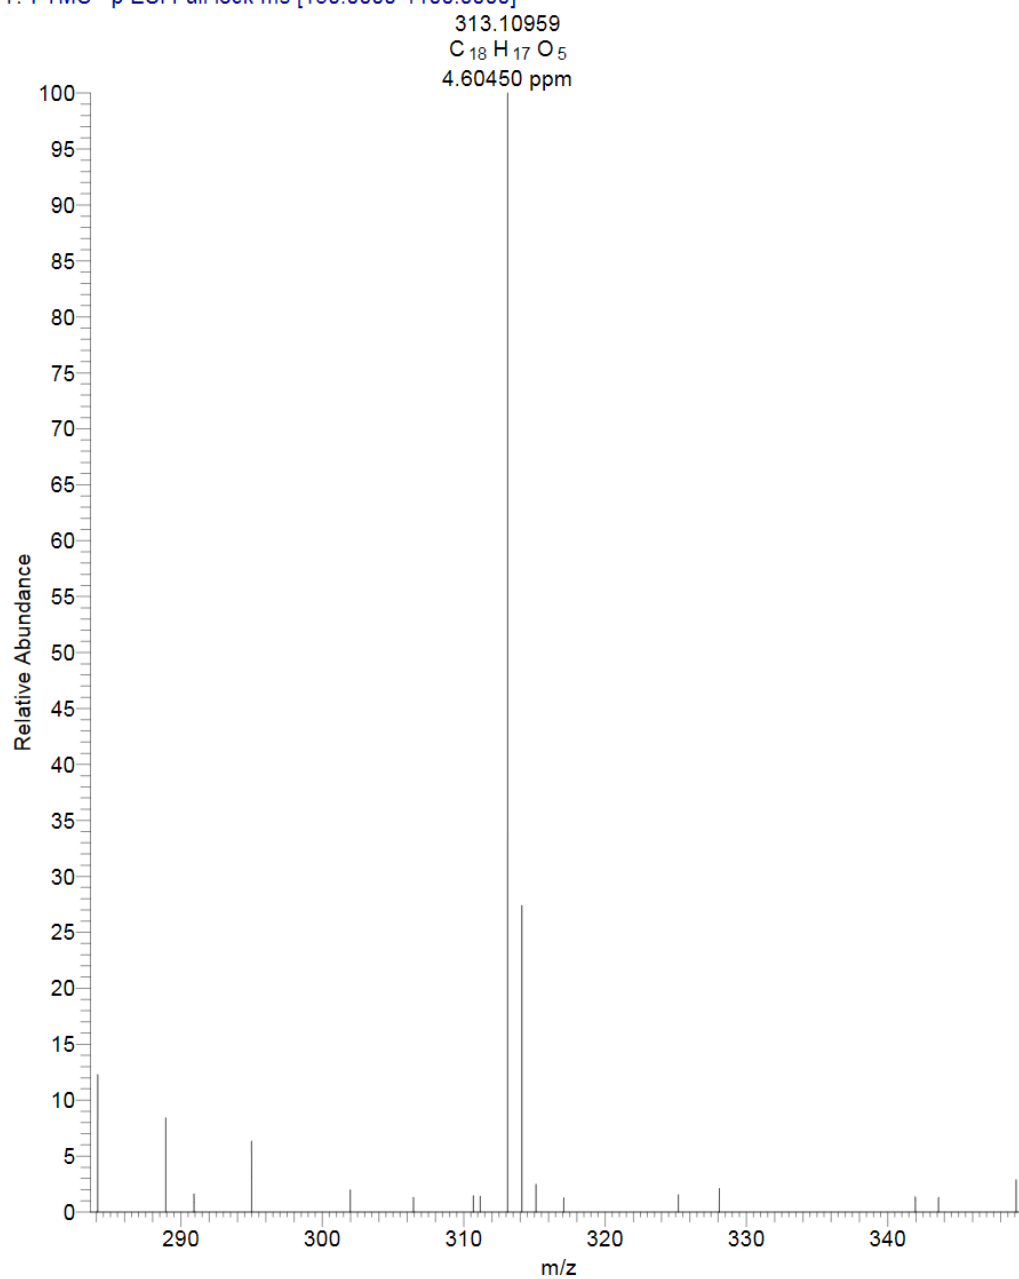

## Section S2. Computational details for compounds 1–5.

### Section S2-1. Computational details for paeobenzofuranone A (1) (ECD)

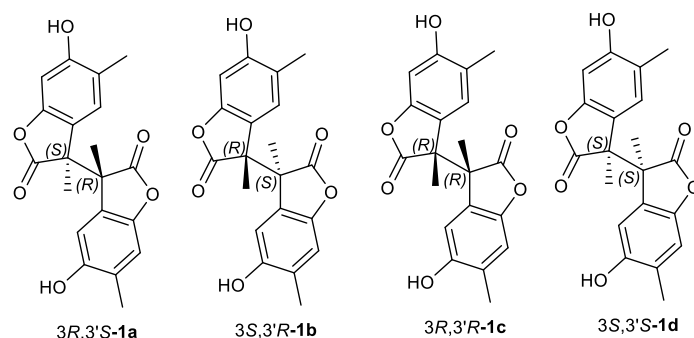

Conformation search based on molecular mechanics with MMFF force fields were performed for **1a**, **1b**, **1c** and **1d** gave 16 low-energy conformers with populations higher than 1%, respectively. All these conformers were further optimized by the density functional theory method at the B3LYP/6-311G(d) level by Gaussian 16 program package. The ECD were calculated using density functional theory (TDDFT) at B3LYP/6-31+G(d,p) level in methanol with IEFPCM model. The calculated ECD curves were all generated using SpecDis 1.71 with  $\sigma = 0.30$  eV, and UV shift -15.7 nm, respectively.

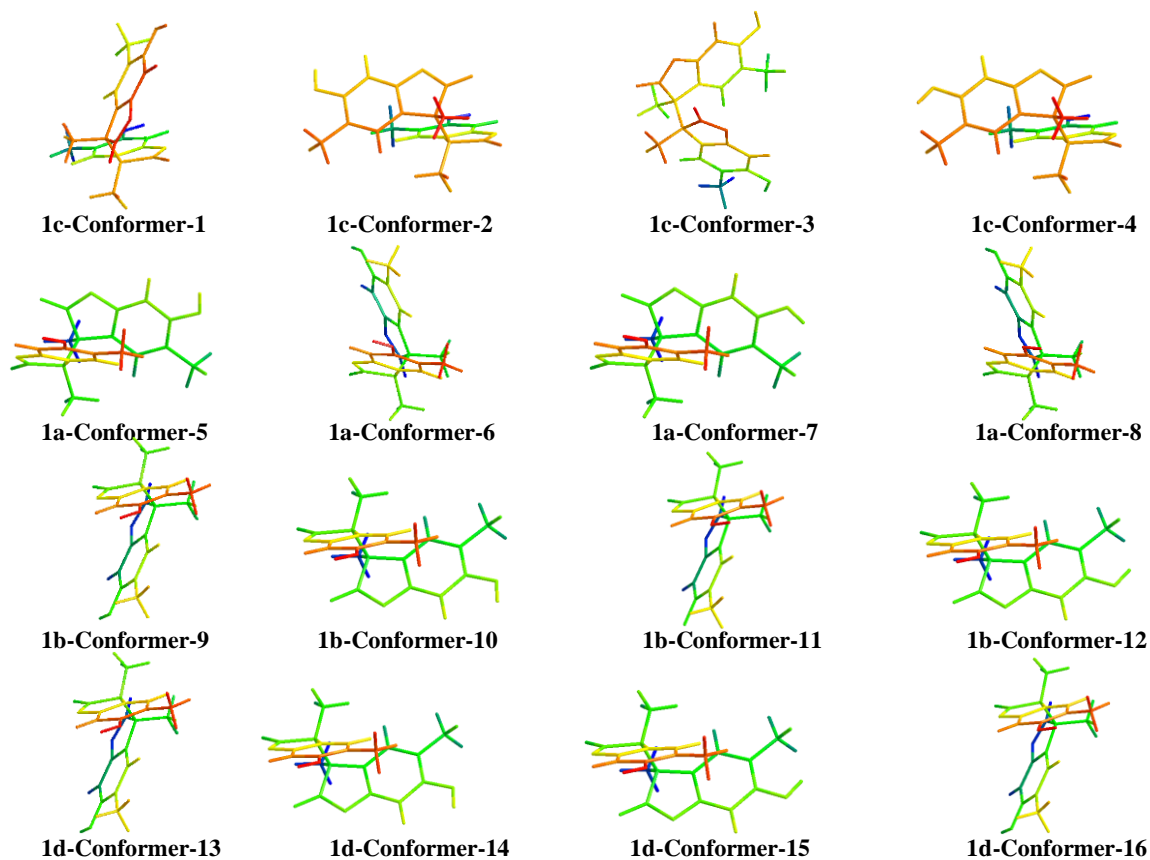

Figure S31. Low-energy Conformers of compound 1 in MeOH

**Table S1.** Energy analysis for conformers of **1** at B3LYP/6-31+G(d,p) level in the gas phase

| Species      | $E'=E+ZPE$   | $E$          | $H$          | $G$          | $\Delta G$ | $\Delta E(kcal/mol)$ | $PE\%$ |
|--------------|--------------|--------------|--------------|--------------|------------|----------------------|--------|
| <b>1c-1</b>  | -1224.096269 | -1224.073042 | -1224.072097 | -1224.147276 | 0.000092   | 0.057731             | 19.77% |
| <b>1c-2</b>  | -1224.096269 | -1224.073042 | -1224.072097 | -1224.147276 | 0.000092   | 0.057731             | 19.77% |
| <b>1c-3</b>  | -1224.095633 | -1224.072406 | -1224.071462 | -1224.146579 | 0.000789   | 0.495105             | 9.45%  |
| <b>1c-4</b>  | -1224.095633 | -1224.072406 | -1224.071462 | -1224.146579 | 0.000789   | 0.495105             | 9.45%  |
| <b>1a-5</b>  | -1224.096269 | -1224.073042 | -1224.072097 | -1224.147276 | 0.000093   | 0.057741             | 19.97% |
| <b>1a-6</b>  | -1224.096269 | -1224.073042 | -1224.072097 | -1224.147276 | 0.000092   | 0.057731             | 19.77% |
| <b>1a-7</b>  | -1224.095633 | -1224.072406 | -1224.071462 | -1224.146579 | 0.000789   | 0.495105             | 0.00%  |
| <b>1a-8</b>  | -1224.095633 | -1224.072406 | -1224.071462 | -1224.146579 | 0.000789   | 0.495105             | 0.00%  |
| <b>1a-8</b>  | -1224.096269 | -1224.073042 | -1224.072097 | -1224.14727  | 0.000098   | 0.061496             | 0.00%  |
| <b>1b-9</b>  | -1224.096269 | -1224.073042 | -1224.072097 | -1224.147276 | 0.000092   | 0.057731             | 0.00%  |
| <b>1b-10</b> | -1224.095633 | -1224.072406 | -1224.071462 | -1224.146579 | 0.000789   | 0.495105             | 0.00%  |
| <b>1b-11</b> | -1224.095633 | -1224.072406 | -1224.071462 | -1224.146579 | 0.000789   | 0.495105             | 0.00%  |
| <b>1b-12</b> | -1224.095633 | -1224.072406 | -1224.071462 | -1224.146579 | 0.000789   | 0.495105             | 0.00%  |
| <b>1d-13</b> | -1224.096269 | -1224.073042 | -1224.072097 | -1224.147276 | 0.000092   | 0.057731             | 0.00%  |
| <b>1d-14</b> | -1224.096269 | -1224.073042 | -1224.072097 | -1224.147276 | 0.000092   | 0.057731             | 0.00%  |
| <b>1d-15</b> | -1224.095633 | -1224.072406 | -1224.071462 | -1224.146579 | 0.000789   | 0.495105             | 0.00%  |
| <b>1d-16</b> | -1224.095633 | -1224.072406 | -1224.071462 | -1224.146579 | 0.000789   | 0.495105             | 0.00%  |

$E$ ,  $E'$ ,  $H$ ,  $G$ : total energy, total energy with zero point energy (ZPE), enthalpy, and Gibbs free energy

## Section S2-2. Computational details for paeobenzofuranone B (2) (ECD)

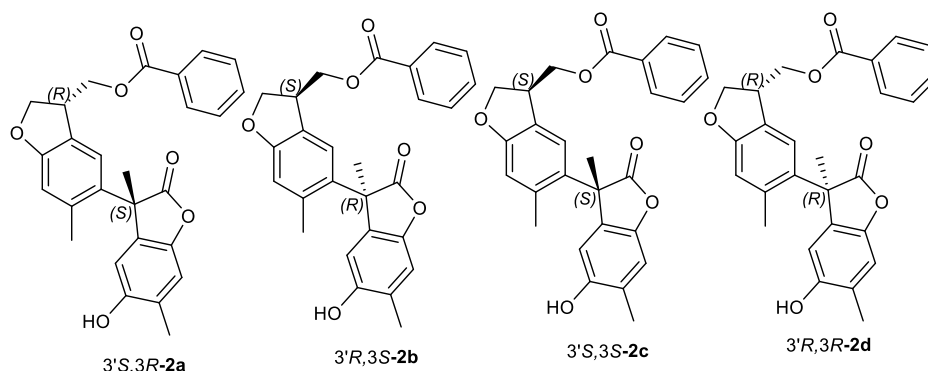

Conformation search based on molecular mechanics with MMFF force fields were performed for **2a,2b,1c** and **2d** gave 16 low-energy conformers with populations higher than 1%, respectively. All these conformers were further optimized by the density functional theory method at the B3LYP/6-311G(d) level by Gaussian 16 program package. The ECD were calculated using density functional theory (TDDFT) at B3LYP/6-31+G(d,p) level in methanol with IEFPCM model. The calculated ECD curves were all generated using SpecDis 1.71 with  $\sigma = 0.30$  eV, and UV shift -32.8nm, respectively.

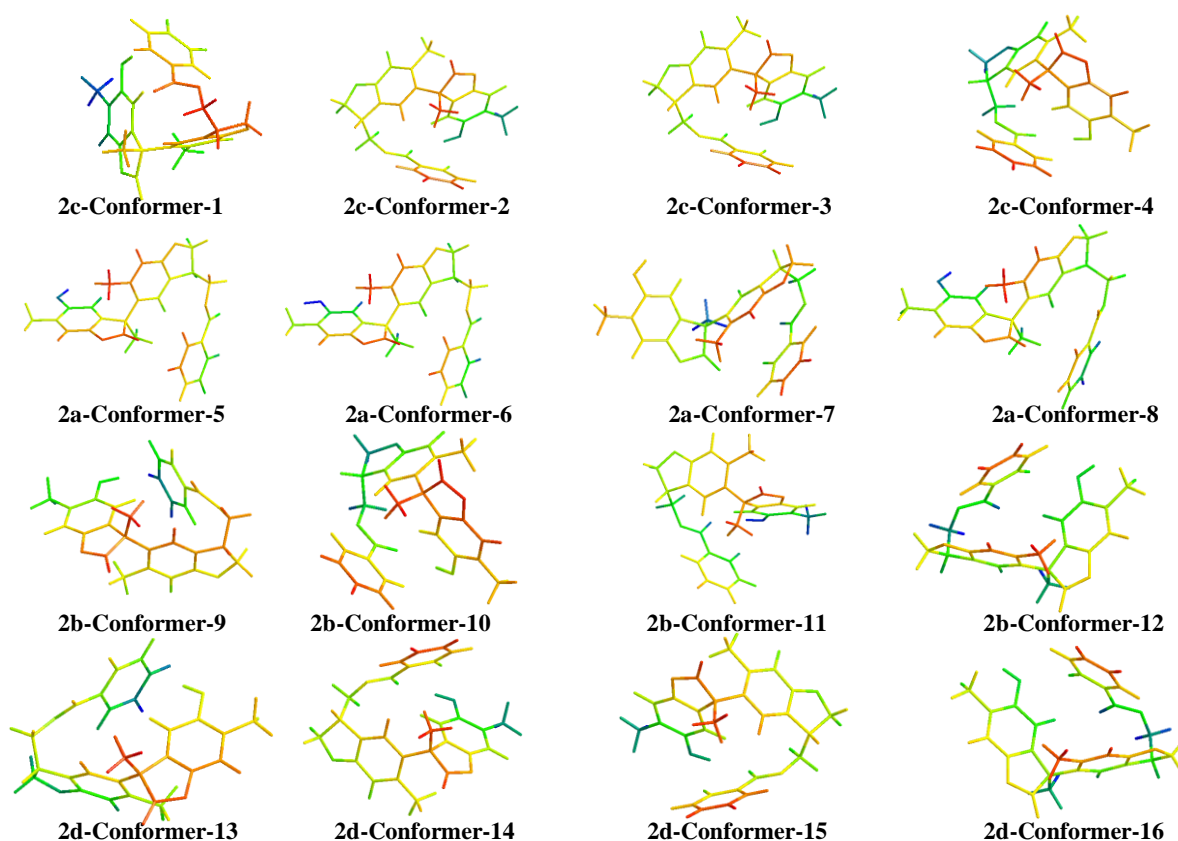

Figure S32. Low-energy Conformers of compound 2 in MeOH

**Table S2.** Energy analysis for conformers of **2** at B3LYP/6-31+G(d,p) level in the gas phase

| Species      | $E'=E+ZPE$   | $E$          | $H$          | $G$          | $\Delta G$ | $\Delta E(\text{kcal/mol})$ | $PE\%$ |
|--------------|--------------|--------------|--------------|--------------|------------|-----------------------------|--------|
| <b>2c-1</b>  | -1494.382728 | -1494.354411 | -1494.353466 | -1494.442059 | 0.000001   | 0.000628                    | 90.69% |
| <b>2c-2</b>  | -1494.381002 | -1494.352961 | -1494.352017 | -1494.4389   | 0.003160   | 1.982930                    | 3.19%  |
| <b>2c-3</b>  | -1494.381002 | -1494.352961 | -1494.352017 | -1494.438899 | 0.003161   | 1.983558                    | 3.18%  |
| <b>2c-4</b>  | -1494.381043 | -1494.352921 | -1494.351977 | -1494.438785 | 0.003275   | 2.055094                    | 2.82%  |
| <b>2a-5</b>  | -1494.376179 | -1494.347885 | -1494.346941 | -1494.435446 | 0.006614   | 4.150348                    | 0.08%  |
| <b>2a-6</b>  | -1494.375493 | -1494.347182 | -1494.346238 | -1494.434685 | 0.007375   | 4.627883                    | 0.04%  |
| <b>2a-7</b>  | -1494.378155 | -1494.349974 | -1494.349029 | -1494.436381 | 0.005679   | 3.563626                    | 0.03%  |
| <b>2a-8</b>  | -1494.375563 | -1494.347255 | -1494.34631  | -1494.434251 | 0.007809   | 4.900222                    | 0.06%  |
| <b>2b-9</b>  | -1494.382728 | -1494.354411 | -1494.353466 | -1494.442059 | 0.000001   | 0.000628                    | 0.10%  |
| <b>2b-10</b> | -1494.381002 | -1494.352961 | -1494.352017 | -1494.4389   | 0.003160   | 1.982930                    | 0.05%  |
| <b>2b-11</b> | -1494.381002 | -1494.352961 | -1494.352017 | -1494.438899 | 0.003161   | 1.983558                    | 0.06%  |
| <b>2b-12</b> | -1494.381043 | -1494.352921 | -1494.351977 | -1494.438785 | 0.003275   | 2.055094                    | 0.12%  |
| <b>2d-13</b> | -1494.382729 | -1494.354411 | -1494.353467 | -1494.44206  | 0.000000   | 0.000000                    | 0.13%  |
| <b>2d-14</b> | -1494.381002 | -1494.352961 | -1494.352017 | -1494.438901 | 0.003159   | 1.982303                    | 0.07%  |
| <b>2d-15</b> | -1494.381002 | -1494.352961 | -1494.352017 | -1494.4389   | 0.003160   | 1.982930                    | 0.08%  |
| <b>2d-16</b> | -1494.381043 | -1494.352921 | -1494.351977 | -1494.438784 | 0.003276   | 2.055721                    | 0.09%  |

$E$ ,  $E'$ ,  $H$ ,  $G$ : total energy, total energy with zero point energy (ZPE), enthalpy, and Gibbs free energy

### Section S2-3. Computational details for paeobenzofuranone C (3) (ECD)

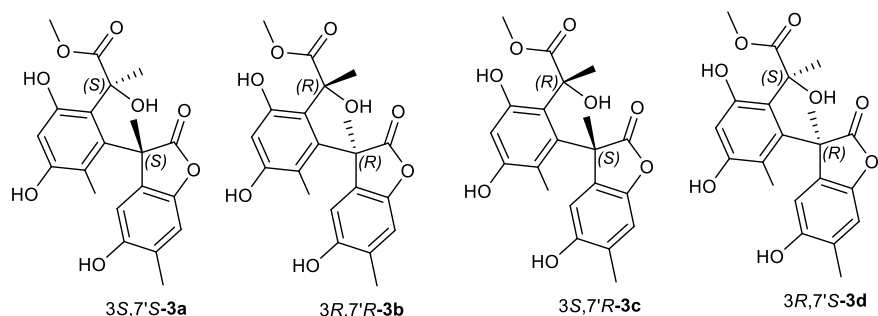

Conformation search based on molecular mechanics with MMFF force fields were performed for **3a**, **3b**, **3c** and **3d** gave 16 low-energy conformers with populations higher than 1%, respectively. All these conformers were further optimized by the density functional theory method at the B3LYP/6-311G(d) level by Gaussian 16 program package. The ECD were calculated using density functional theory (TDDFT) at B3LYP/6-31+G(d,p) level in methanol with IEFPCM model. The calculated ECD curves were all generated using SpecDis 1.71 with  $\sigma = 0.30$  eV, and UV shift -27.5nm, respectively.

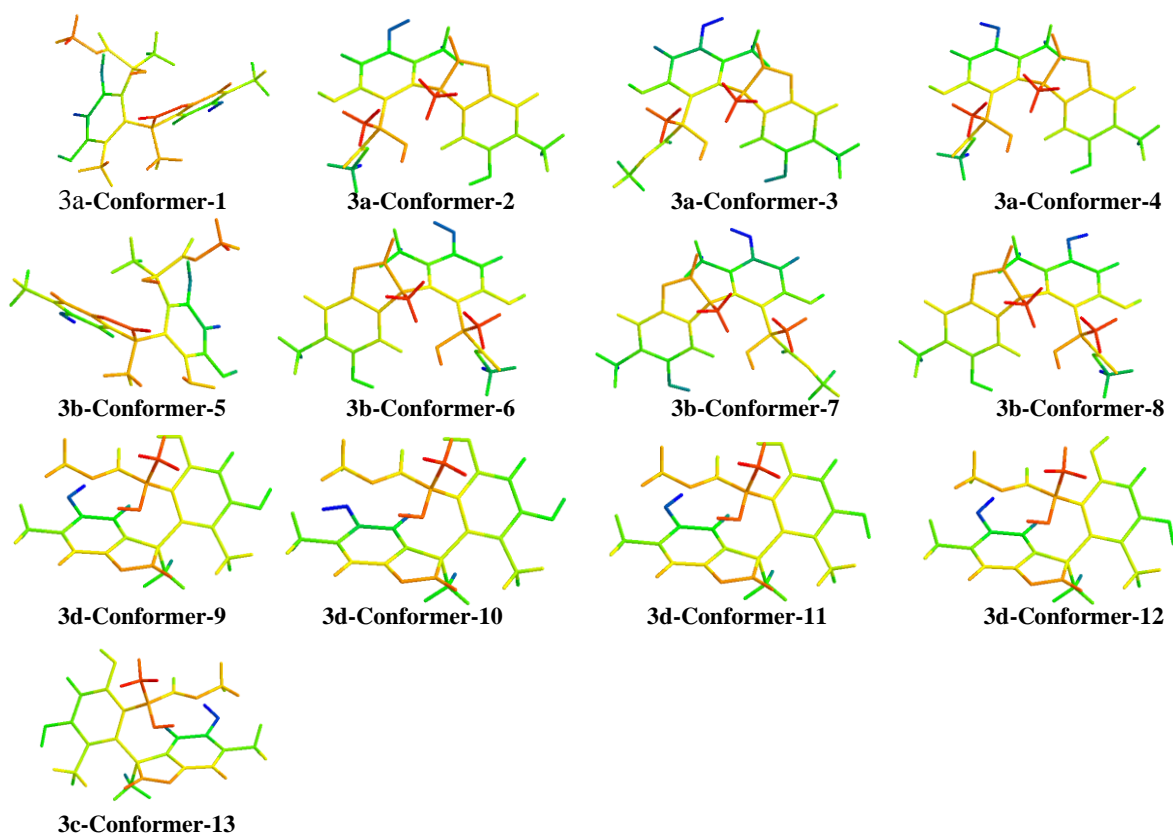

**Figure S33. Low-energy Conformers of compound 3 in MeOH**

**Table S3.** Energy analysis for conformers of **3** at B3LYP/6-31+G(d,p) level in the gas phase

| Species      | $E'=E+ZPE$   | $E$          | $H$          | $G$          | $\Delta G$ | $\Delta E(kcal/mol)$ | $PE\%$ |
|--------------|--------------|--------------|--------------|--------------|------------|----------------------|--------|
| <b>3a-1</b>  | -1413.275394 | -1413.248319 | -1413.247374 | -1413.3301   | 0.012476   | 7.828809             | 34.50% |
| <b>3a-2</b>  | -1413.27436  | -1413.246906 | -1413.245961 | -1413.329161 | 0.013415   | 8.418040             | 12.75% |
| <b>3a-3</b>  | -1413.271933 | -1413.244367 | -1413.243423 | -1413.327278 | 0.015298   | 9.599640             | 1.73%  |
| <b>3a-4</b>  | -1413.273028 | -1413.245435 | -1413.244491 | -1413.32802  | 0.014556   | 9.134028             | 3.81%  |
| <b>3b-5</b>  | -1413.275395 | -1413.24832  | -1413.247376 | -1413.330099 | 0.012477   | 7.829436             | 34.46% |
| <b>3b-6</b>  | -1413.27436  | -1413.246906 | -1413.245961 | -1413.329161 | 0.013415   | 8.418040             | 12.75% |
| <b>3b-7</b>  | -1413.27436  | -1413.246906 | -1413.245961 | -1413.329161 | 0.013415   | 8.418040             | 0.06%  |
| <b>3d-8</b>  | -1413.273028 | -1413.245435 | -1413.244491 | -1413.32802  | 0.014556   | 9.134028             | 0.08%  |
| <b>3d-9</b>  | -1413.29006  | -1413.26338  | -1413.262436 | -1413.342576 | 0.000000   | 0.000000             | 0.10%  |
| <b>3d-10</b> | -1413.287228 | -1413.260494 | -1413.25955  | -1413.339761 | 0.002815   | 1.766439             | 0.03%  |
| <b>3d-11</b> | -1413.289106 | -1413.262454 | -1413.26151  | -1413.341566 | 0.001010   | 0.633785             | 0.02%  |
| <b>3d-12</b> | -1413.279469 | -1413.252272 | -1413.251328 | -1413.333047 | 0.009529   | 5.979538             | 0.04%  |
| <b>3c-13</b> | -1413.29006  | -1413.26338  | -1413.262436 | -1413.342576 | 0.000000   | 0.000000             | 0.09%  |

$E$ ,  $E'$ ,  $H$ ,  $G$ : total energy, total energy with zero point energy (ZPE), enthalpy, and Gibbs free energy

## Section S2-4. Computational details for paeobenzofuranone D (4) (ECD)

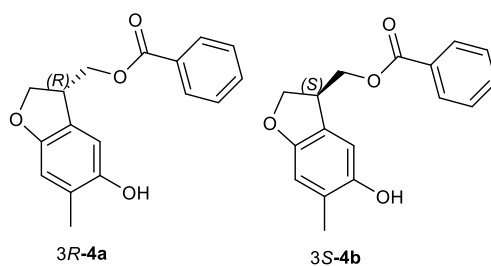

Conformation search based on molecular mechanics with MMFF force fields were performed for **4a**, **4b**, **4c** and **4d** gave 7 low-energy conformers with populations higher than 1%, respectively. All these conformers were further optimized by the density functional theory method at the B3LYP/6-311G(d) level by Gaussian 16 program package. The ECD were calculated using density functional theory (TDDFT) at B3LYP/6-31+G(d,p) level in methanol with IEFPCM model. The calculated ECD curves were all generated using SpecDis 1.71 with  $\sigma = 0.30$  eV, and UV shift -25.8nm, respectively.

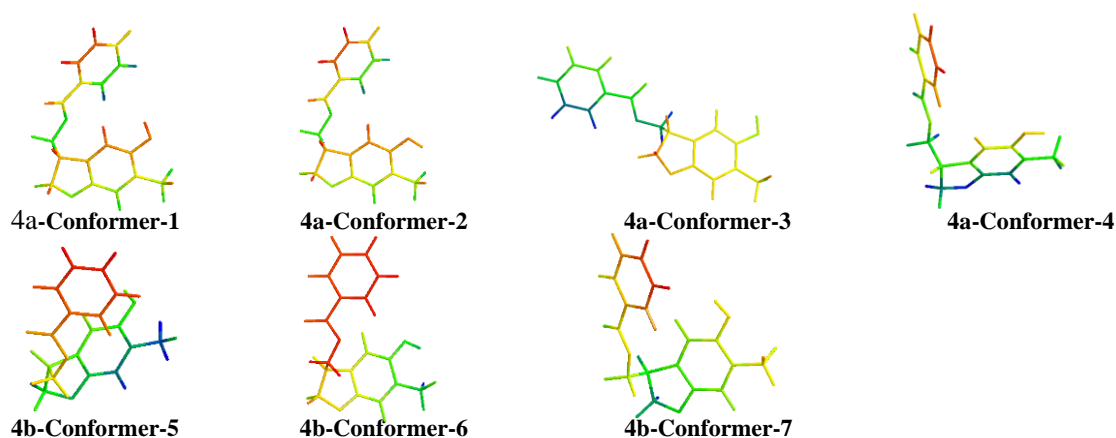

**Figure S34. Low-energy Conformers of compound 4 in MeOH**

**Table S4.** Energy analysis for conformers of **4** at B3LYP/6-31+G(d,p) level in the gas phase

| Species     | $E'=E+ZPE$  | $E$         | $H$         | $G$         | $\Delta G$ | $\Delta E(kcal/mol)$ | PE%    |
|-------------|-------------|-------------|-------------|-------------|------------|----------------------|--------|
| <b>4a-1</b> | -956.960332 | -956.942475 | -956.941531 | -957.00803  | 0.000001   | 0.000628             | 27.95% |
| <b>4a-2</b> | -956.959011 | -956.940959 | -956.940015 | -957.007156 | 0.000875   | 0.549071             | 11.07% |
| <b>4a-3</b> | -956.959753 | -956.941839 | -956.940895 | -957.007608 | 0.000423   | 0.265437             | 17.87% |
| <b>4a-4</b> | -956.957372 | -956.939175 | -956.93823  | -957.006208 | 0.001823   | 1.143950             | 4.05%  |
| <b>4b-5</b> | -956.960332 | -956.942475 | -956.94153  | -957.008031 | 0.000000   | 0.000000             | 27.98% |
| <b>4b-6</b> | -956.959011 | -956.940959 | -956.940015 | -957.007156 | 0.000875   | 0.549071             | 11.07% |
| <b>4b-7</b> | -956.960332 | -956.942475 | -956.94153  | -957.00803  | 0.000001   | 0.000628             | 0.00%  |

$E$ ,  $E'$ ,  $H$ ,  $G$ : total energy, total energy with zero point energy (ZPE), enthalpy, and Gibbs free energy

## Section S2-5. Computational details for paeobenzofuranone E (5) (ECD)

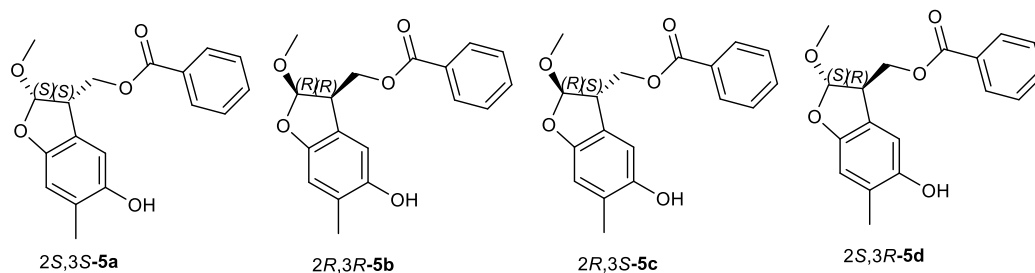

Conformation search based on molecular mechanics with MMFF force fields were performed for **5a**, **5b**, **5c** and **5d** gave 15 low-energy conformers with populations higher than 1%, respectively. All these conformers were further optimized by the density functional theory method at the B3LYP/6-311G(d) level by Gaussian 16 program package. The ECD were calculated using density functional theory (TDDFT) at B3LYP/6-31+G(d,p) level in methanol with IEFPCM model. The calculated ECD curves were all generated using SpecDis 1.71 with  $\sigma = 0.30$  eV, and UV shift -28.6nm, respectively.

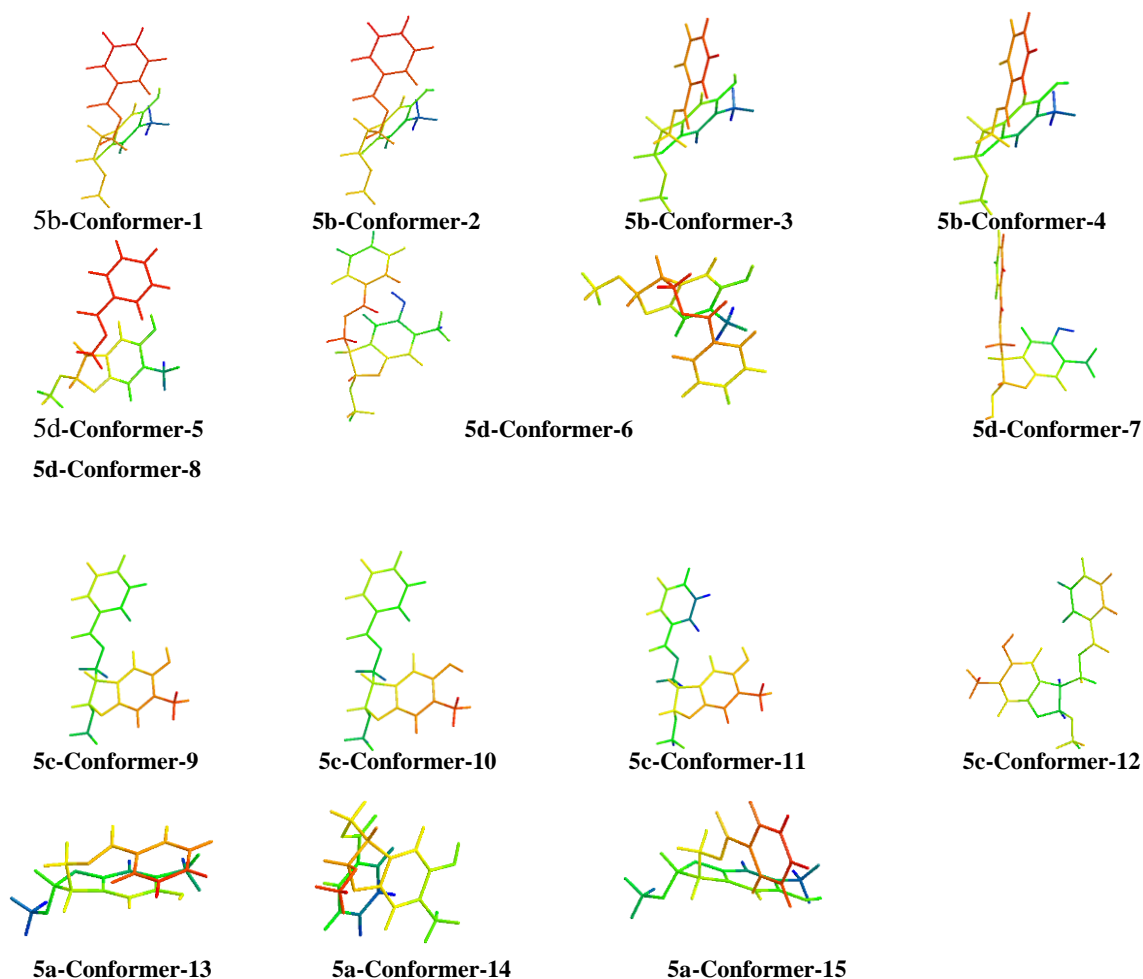

Figure S35. Low-energy Conformers of compound 5 in MeOH

**Table S5.** Energy analysis for conformers of **5** at B3LYP/6-31+G(d,p) level in the gas phase

| Species      | $E'=E+ZPE$   | $E$          | $H$          | $G$          | $\Delta G$ | $\Delta E(kcal/mol)$ | $PE\%$ |
|--------------|--------------|--------------|--------------|--------------|------------|----------------------|--------|
| <b>5b-1</b>  | -1071.328153 | -1071.30774  | -1071.306796 | -1071.379079 | 0.001836   | 1.152107             | 29.80% |
| <b>5b-2</b>  | -1071.327025 | -1071.306577 | -1071.305633 | -1071.377936 | 0.002979   | 1.869351             | 8.87%  |
| <b>5b-3</b>  | -1071.327364 | -1071.306777 | -1071.305833 | -1071.378811 | 0.002104   | 1.320280             | 22.43% |
| <b>5b-4</b>  | -1071.326143 | -1071.305465 | -1071.304521 | -1071.377568 | 0.003347   | 2.100274             | 6.01%  |
| <b>5d-5</b>  | -1071.327342 | -1071.306839 | -1071.305895 | -1071.378945 | 0.001970   | 1.236194             | 25.85% |
| <b>5d-6</b>  | -1071.327765 | -1071.307473 | -1071.306529 | -1071.377717 | 0.003198   | 2.006775             | 7.04%  |
| <b>5d-7</b>  | -1071.33102  | -1071.310739 | -1071.309795 | -1071.380915 | 0.000000   | 0.000000             | 0.03%  |
| <b>5d-8</b>  | -1071.324986 | -1071.304157 | -1071.303213 | -1071.377435 | 0.003480   | 2.183733             | 0.01%  |
| <b>5c-9</b>  | -1071.328153 | -1071.30774  | -1071.306796 | -1071.379079 | 0.001836   | 1.152107             | 0.08%  |
| <b>5c-10</b> | -1071.327025 | -1071.306577 | -1071.305633 | -1071.377936 | 0.002979   | 1.869351             | 0.05%  |
| <b>5c-11</b> | -1071.328153 | -1071.30774  | -1071.306796 | -1071.379079 | 0.001836   | 1.152107             | 0.03%  |
| <b>5c-12</b> | -1071.327364 | -1071.306777 | -1071.305833 | -1071.378811 | 0.002104   | 1.320280             | 0.02%  |
| <b>5a-13</b> | -1071.327765 | -1071.307473 | -1071.306529 | -1071.378811 | 0.002104   | 1.320280             | 0.10%  |
| <b>5a-14</b> | -1071.33102  | -1071.310739 | -1071.309795 | -1071.380915 | 0.000000   | 0.000000             | 0.02%  |
| <b>5a-15</b> | -1071.324986 | -1071.304157 | -1071.303213 | -1071.377435 | 0.003480   | 2.183733             | 0.04%  |

$E$ ,  $E'$ ,  $H$ ,  $G$ : total energy, total energy with zero point energy (ZPE), enthalpy, and Gibbs free energy
